# Supplementary material for: The oxidative dehydrogenation of a coumarinyl scaffold with copper ion and metal ion detection in human liver cancer cells (HepG2)
Source: Royal Society of Chemistry journal article supplement (doi:10.1039/c9dt03870a), 2019-01-01
Supplement: c9dt03870a1.pdf [file c9dt03870a1.pdf]

**Electronic Supplementary Material (ESI)**

**Table of Contents**

| <b>Sl. No.</b> | <b>Contents</b>                                                                                                                                                  | <b>Figure/Table No.</b> |
|----------------|------------------------------------------------------------------------------------------------------------------------------------------------------------------|-------------------------|
| 1.             | Experimental section: Materials and methods                                                                                                                      |                         |
| 2.             | Calculation of Limit of Detection (LOD) and Quantum yield                                                                                                        |                         |
| 3.             | Common solution preparation for UV-Vis and fluorescence measurements                                                                                             |                         |
| 4.             | Cell line culture and cell imaging study                                                                                                                         |                         |
| 5.             | $^1\text{H}$ NMR spectrum of L in DMSO- $d_6$ .                                                                                                                  | Fig. S1                 |
| 6.             | $^{13}\text{C}$ NMR spectrum of L in DMSO- $d_6$ .                                                                                                               | Fig. S2                 |
| 7.             | ESI- MS spectrum of L.                                                                                                                                           | Fig. S3                 |
| 8.             | FT-IR Spectrum of L.                                                                                                                                             | Fig. S4                 |
| 9.             | FT-IR spectrum of $[\text{Zn}(\text{L}')\text{OAc}]$ complex.                                                                                                    | Fig. S5                 |
| 10.            | ESI-MS spectrum of $[\text{Zn}(\text{L}')\text{OAc}]$ complex.                                                                                                   | Fig. S6                 |
| 11.            | Crystal data and refinement parameters for ligand, L, $[\text{Cu}(\text{L}'')\text{Cl}]$ and $[\text{Cu}(\text{L}'')\text{ClO}_4]$                               | Table S1                |
| 12.            | Some important bond length and bond angles of L                                                                                                                  | Table S2                |
| 13.            | Various supramolecular interaction in L                                                                                                                          | Fig. S7                 |
| 14.            | Selected bond length and bond angles of $[\text{Cu}(\text{L}'')\text{Cl}]$ complex                                                                               | Table S3                |
| 15.            | Selected bond length and bond angles of $[\text{Cu}(\text{L}'')(\text{ClO}_4)]$ complex                                                                          | Table S4                |
| 16.            | Solid state emission spectrum of the ligand, L and L- $\text{Zn}^{2+}$ complex ( $\lambda_{\text{ex}}$ 400 nm, excitation slit 15 nm and emission slit 5 nm).    | Fig. S8                 |
| 17.            | Absorbance spectral change of ligand, L on incremental addition of $\text{Zn}^{2+}$ ion in 9:1 (v/v) EtOH/ $\text{H}_2\text{O}$ (HEPES buffer, pH 7.4).          | Fig. S9                 |
| 18.            | Fluorescence spectra of ligand, L in presence of various cations in 9:1 (v/v) EtOH/ $\text{H}_2\text{O}$ (HEPES buffer, pH 7.4), $\lambda_{\text{ex}}$ . 400 nm. | Fig. S10                |
| 19.            | Job's plot for binding stoichiometry determination in L with $\text{Zn}^{2+}$ .                                                                                  | Fig. S11                |

|     |                                                                                                                                                                                                                                       |          |
|-----|---------------------------------------------------------------------------------------------------------------------------------------------------------------------------------------------------------------------------------------|----------|
| 20. | $^1\text{H}$ NMR titration experiment in <b>L</b> with $\text{Zn}^{2+}$ addition in $\text{DMSO-d}_6$ .                                                                                                                               | Fig. S12 |
| 21. | Benesi-Hildebrand plot determining the binding constant of <b>L</b> with $\text{Zn}^{2+}$ .                                                                                                                                           | Fig. S13 |
| 22. | LOD determination for $\text{Zn}^{2+}$ ion.                                                                                                                                                                                           | Fig. S14 |
| 23. | Some reports of coumarin derivative to $\text{Zn}^{2+}$ ion sensitivity                                                                                                                                                               | Table S5 |
| 24. | pH dependency on $\text{Zn}^{2+}$ ion sensitivity.                                                                                                                                                                                    | Fig. S15 |
| 25. | Interference study on $\text{Zn}^{2+}$ ion sensitivity (M= different metal ions present in 3 eqv.)                                                                                                                                    | Fig. S16 |
| 26. | (a) Fluorescence spectra of ligand, <b>L</b> in absence and presence of various metal cations in 9:1 (v/v) EtOH/ $\text{H}_2\text{O}$ (HEPES buffer, pH 7.4)<br>(b) vial image in normal light under UV light, 365 nm.                | Fig. S17 |
| 27. | LOD determination for $\text{Cu}^{2+}$ ion.                                                                                                                                                                                           | Fig. S18 |
| 28. | Fluorescence spectra of in-situ generated $[\text{Zn}(\text{L}')\text{OAc}]$ complex on incremental addition of $\text{Cu}^{2+}$ ion in 9:1 (v/v) EtOH/ $\text{H}_2\text{O}$ (HEPES buffer, pH 7.4), $\lambda_{\text{ex}}$ . 400 nm.  | Fig. S19 |
| 29. | X- Band EPR spectra (a) gradual addition of $[\text{Zn}(\text{L}')\text{OAc}]$ complex to $\text{CuCl}_2$ solution in $\text{CH}_3\text{CN}$ (b) isolated $[\text{Cu}(\text{L}'')\text{Cl}]$ complex in $\text{CH}_3\text{CN}$ .      | Fig. S20 |
| 30. | (a) Absorbance spectra of ligand, <b>L</b> in absence and presence of various metal cations in 9:1 (v/v) EtOH/ $\text{H}_2\text{O}$ (HEPES buffer, pH 7.4; inset: zooming image at higher wavelength. (b) vial image in normal light. | Fig. S21 |
| 31. | (a) Absorbance spectra of ligand, <b>L</b> in absence and presence of various metal cations in 9:1 (v/v) EtOH/ $\text{H}_2\text{O}$ (HEPES buffer, pH 7.4; inset: zooming image at higher wavelength. (b) vial image in normal light. | Fig. S22 |
| 32. | Cyclic voltammograms of <b>L</b> and <b>L</b> with addition of $\text{CuCl}_2$ in $\text{CH}_3\text{CN}$                                                                                                                              | Fig. S23 |
| 33. | Absorbance spectra of $\text{L}+\text{Cu}^{2+}$ and $\text{L}+\text{Zn}^{2+}+\text{Cu}^{2+}$ .                                                                                                                                        | Fig. S24 |
| 34. | Job's plot for binding stoichiometry determination for $[\text{Zn}(\text{L}')\text{OAc}]$                                                                                                                                             | Fig. S25 |

|     |                                                                                   |           |
|-----|-----------------------------------------------------------------------------------|-----------|
|     | with Cu <sup>2+</sup> ion.                                                        |           |
| 35. | Binding constant for [Cu(L'')Cl] by Benesi-Hildebrand plot.                       | Fig. S26  |
| 36. | DFT optimized structure of Ligand L, [Zn(L')Cl] and [Cu(L'')Cl] complex.          | Fig. S27  |
| 37. | Some frontier molecular orbitals and energies of the ligand L                     | Table S6  |
| 38. | Some frontier molecular orbitals and energies of the [Zn(L')Cl] complex           | Table S7  |
| 39. | some frontier molecular orbitals and energies of the [Cu(L'')Cl] ( $\alpha$ spin) | Table S8  |
| 40. | Possible electronic transitions on the ligand, <b>L</b> from TD-DFT calculation   | Table S9  |
| 41. | Possible electronic transitions on [Zn(L')Cl] complex from TD-DFT calculation     | Table S10 |
| 42. | Possible electronic transition on [Cu(L'')Cl] complex from TD-DFT calculation     | Table S11 |
| 43. | Optimized coordinates for ligand, <b>L</b>                                        | Table S12 |
| 44. | Optimized coordinates for [Zn(L')Cl] complex                                      | Table S13 |
| 45. | Optimized coordinates for [Cu(L'')Cl] complex                                     | Table S14 |
| 46. | Calibration plot for recovery of Zn <sup>2+</sup> ion.                            | Fig. S28  |
| 47. | Cell survivability of WI-38 cells exposed to <b>L</b> .                           | Fig. S29  |
| 48. | ESI-MS spectrum of [Cu(L'')Cl] complex.                                           | Fig. S30  |
| 49. | ESI-MS spectrum of [Co(L'')(NO <sub>3</sub> )] complex.                           | Fig. S31  |
| 50. | ESI-MS spectrum of [Ni(L'')(Cl)] complex.                                         | Fig. S32  |
| 51. | ESI-MS spectrum of [Fe(L'')(Cl) <sub>2</sub> ] complex.                           | Fig. S33  |
| 52. | References                                                                        |           |

## Experimental section

### Materials and methods

All the reagents of analytical grade were collected from the commercial suppliers and used without further purification. 2-benzoyl pyridine and o-Phenylenediamine were obtained from Sigma-Aldrich and used as received. N<sup>1</sup>-(phenyl(pyridin-2-yl)methyl)benzene-1,2-diamine and 7-hydroxy-4-methyl-2-oxo-2H-chromene-8-carbaldehyde were synthesized by following reported procedure.<sup>[1,2]</sup> The other inorganic salts and organic chemicals were bought from TCI chemicals and Merck. For spectroscopic measurement solvents with spectroscopic grade were used. Before using the solvents for spectroscopic studies these were dried by standard procedures.<sup>[3]</sup> Milli-Q water (Millipore) was used for preparation of aqueous solutions of metal salts. Perkin-Elmer (2400 Series-II, Perkin Elmer, USA) CHN analyzer were used for elemental analysis purpose. The spectra were recorded by Lambda 25 spectrophotometer: UV-Vis; LS55: fluorescence and LX-1FTIR spectrophotometer: FT-IR spectra (KBr disk, 4000-400 cm<sup>-1</sup>) on Perkin Elmer instruments. <sup>1</sup>H and <sup>13</sup>C NMR spectra were taken by Bruker 500 MHz FT-NMR spectrometer (TMS, internal standard). ESI-MS spectra were obtained from HRMS spectrometer (model, XEVO-G2QTOF#YCA351). The X-band EPR spectra were taken by a Magnettech GmbH MiniScope MS400 spectrometer where the microwave frequency was measured with an FC400 frequency counter. The electro analytical instrument, BASi Epsilon-EC for cyclic voltammetric experiments in CH<sub>3</sub>CN solutions containing 0.2 M tetrabutylammonium hexafluorophosphate as a supporting electrolyte was used. For the electrochemical measurements the BASi platinum working electrode, platinum auxiliary electrode, Ag/AgCl reference electrode were used. The redox potential data reported were referenced to Fc<sup>+</sup>/Fc (ferrocenium/ferrocene) couple.

## Calculation of Limit of Detection (LOD) and Quantum yield

The LOD (limit of detection) was calculated from the fluorescence titration experiment acquired by gradual addition of  $\text{Zn}^{2+}$  ion to the ligand (**L**) solution (for  $\text{Zn}^{2+}$ ) and addition of  $\text{Cu}^{2+}$  ion to the  $[\text{Zn}(\text{L}')^+]^+$  complex solution (for  $\text{Cu}^{2+}$ ). The standard deviation was determined from the emission intensity of the free ligand (for  $\text{Zn}^{2+}$ ) and  $[\text{Zn}(\text{L}')^+]^+$  (for  $\text{Cu}^{2+}$ ) with varying the concentration. The limit of detection for  $\text{Zn}^{2+}$  and  $\text{Cu}^{2+}$  were determined by following the equation:  $\text{LOD} = 3 \sigma/m$  where  $\sigma$  is standard deviation;  $m$  is the slope of the curve acquired by fluorescence titration experiment by gradual addition of selective metal ions.

Fluorescence quantum yields ( $\Phi$ ) were obtained by using the equation:

$$\Phi_{\text{sample}} = (\text{OD}_{\text{std.}} \times A_{\text{sample}}) / (\text{OD}_{\text{sample}} \times A_{\text{std.}}) \times \Phi_{\text{std.}}$$

Where,  $A_{\text{sample}}$  and  $A_{\text{std}}$  represent the areas under the fluorescence spectral curves for sample and standard respectively.  $\text{OD}_{\text{sample}}$  and  $\text{OD}_{\text{std.}}$  are the optical densities of the sample and standard respectively at the excitation wavelength.<sup>[4]</sup> In this work, acidic quinine sulfate was taken as the standard with known quantum yield,  $\Phi_{\text{std.}} = 0.54$  for the quantum yield calculation of ligand **L** and  $[\text{Zn}(\text{L}')^+]^+$  complex.

## Common solution preparation for UV-Vis and fluorescence measurements

The  $1.0 \times 10^{-3}$  M stock solution of ligand **L** was prepared in THF. All the required metal cation solution of  $1.0 \times 10^{-3}$  M was arranged in deionized water. 50  $\mu\text{M}$ , **L** solution was prepared in 9:1 (v/v) EtOH/ $\text{H}_2\text{O}$  (HEPES buffer, pH 7.4). The sensitivity and selectivity and all the UV-Vis as well as fluorescence measurements towards metal cations were checked by taking the above stock solution and to this solution 1.0 equivalent metal salt used. Titration of the resulting complex,  $[\text{Zn}(\text{L}')^+]^+$  of 50  $\mu\text{M}$  was carried out by gradual addition of  $\text{Cu}^{2+}$  ion (0-52  $\mu\text{M}$ ). The

absorption and emission path length of the cell used were 1 cm. Fluorescence experiments were carried out using a 10 nm × 5 nm slit width.

### **Cell line culture and cell imaging study**

Hep G2 (Human liver cancer) and WI-38 (human lung fibroblast) cells were acquired from NCCS (National Center for Cell Science) Pune, India. The cells were grown in DMEM with 10% FBS (Fetal Bovine Serum), penicillin/streptomycin (100 units/ml) and 5% CO<sub>2</sub>. The measurements were carried out at a cell density permitting exponential growth and at 37°C. The Hep G2 cells were grown in coverslips for 24 h. The ligand solution was prepared by dissolving it in ethanol/water with at a ratio of 1:9 (v/v). Then the cells were either mock-treated or treated with 5 μM of ligand (**L**) and 10 μM Zn<sup>2+</sup> salt in the presence or absence of 10 μM of Cu<sup>2+</sup> and incubated for 24 h at 37°C.<sup>[5]</sup> The cells were washed with 1×PBS. Then fluorescence microscope images are taken by mounting this on a glass slide and observed under Leica fluorescence microscope.

Cell survivability of the ligand, **L** was studied in WI-38 cell as reported earlier.<sup>[6]</sup> In briefly, cell viability of WI-38 cells after exposure to various concentrations of ligand was judged by MTT assay measurement. The cells were seeded in 96-well plates at 1×10<sup>4</sup> cells per well and exposed to ligand, **L** at varying concentration of 0 μM, 20 μM, 40 μM, 60 μM, 80 μM, 100 μM for 24 h. After incubation cells were washed with 1×PBS in twice and incubated with MTT solution (450 μg/ml) for 3-4 h at 37°C. The above resulting formazan crystals were dissolved in an MTT solubilization buffer and the absorbance was measured at 570 nm on a spectrophotometer (BioTek) and the value was compared with control cells.

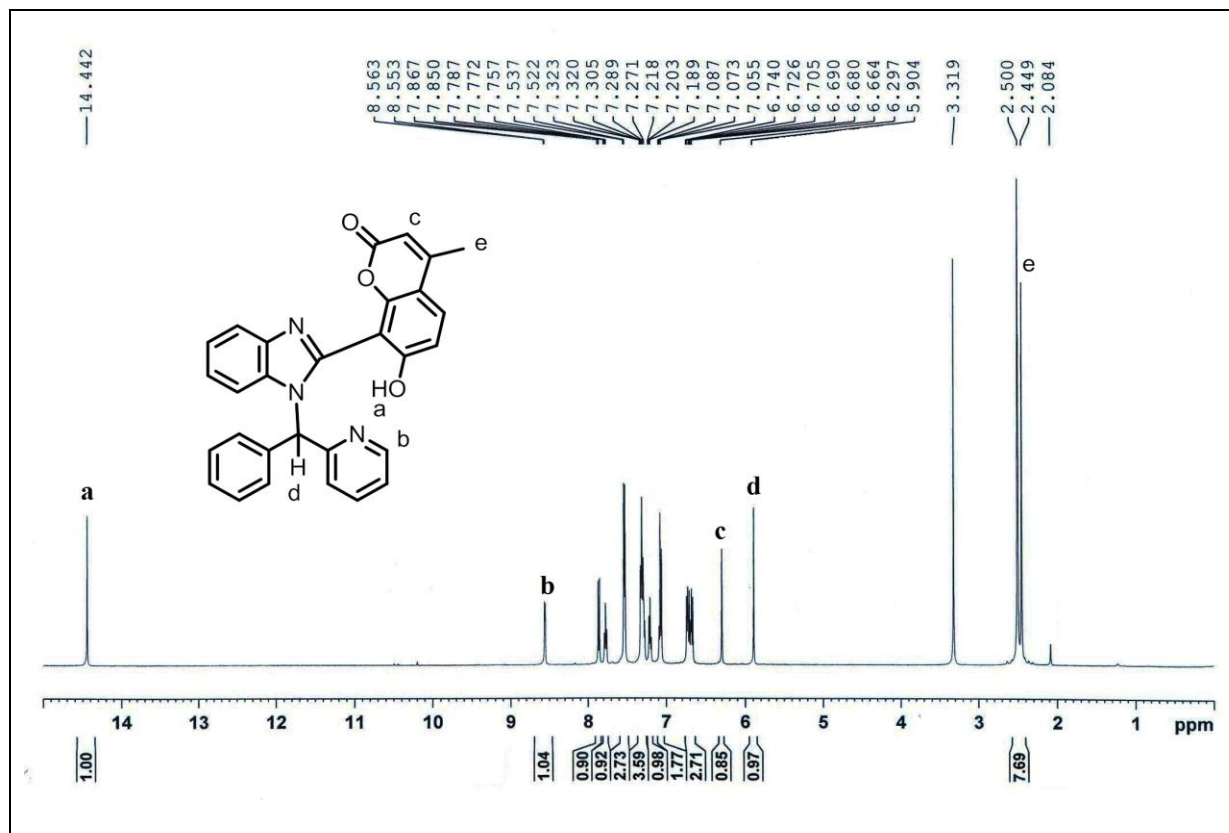

**Fig. S1** <sup>1</sup>H NMR spectrum of **L** in DMSO-d<sub>6</sub>.

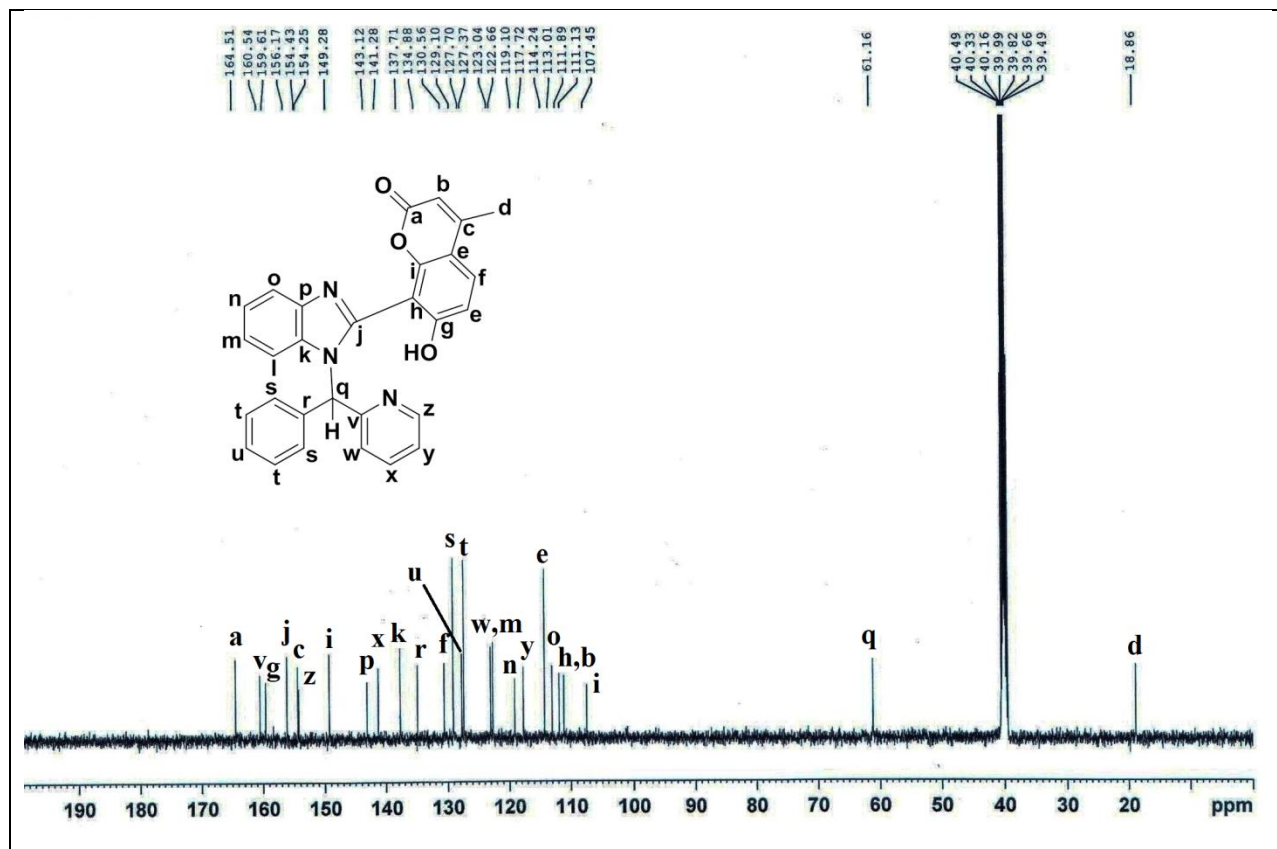

**Fig. S2**  $^{13}\text{C}$  NMR spectrum of **L** in  $\text{DMSO-d}_6$ .



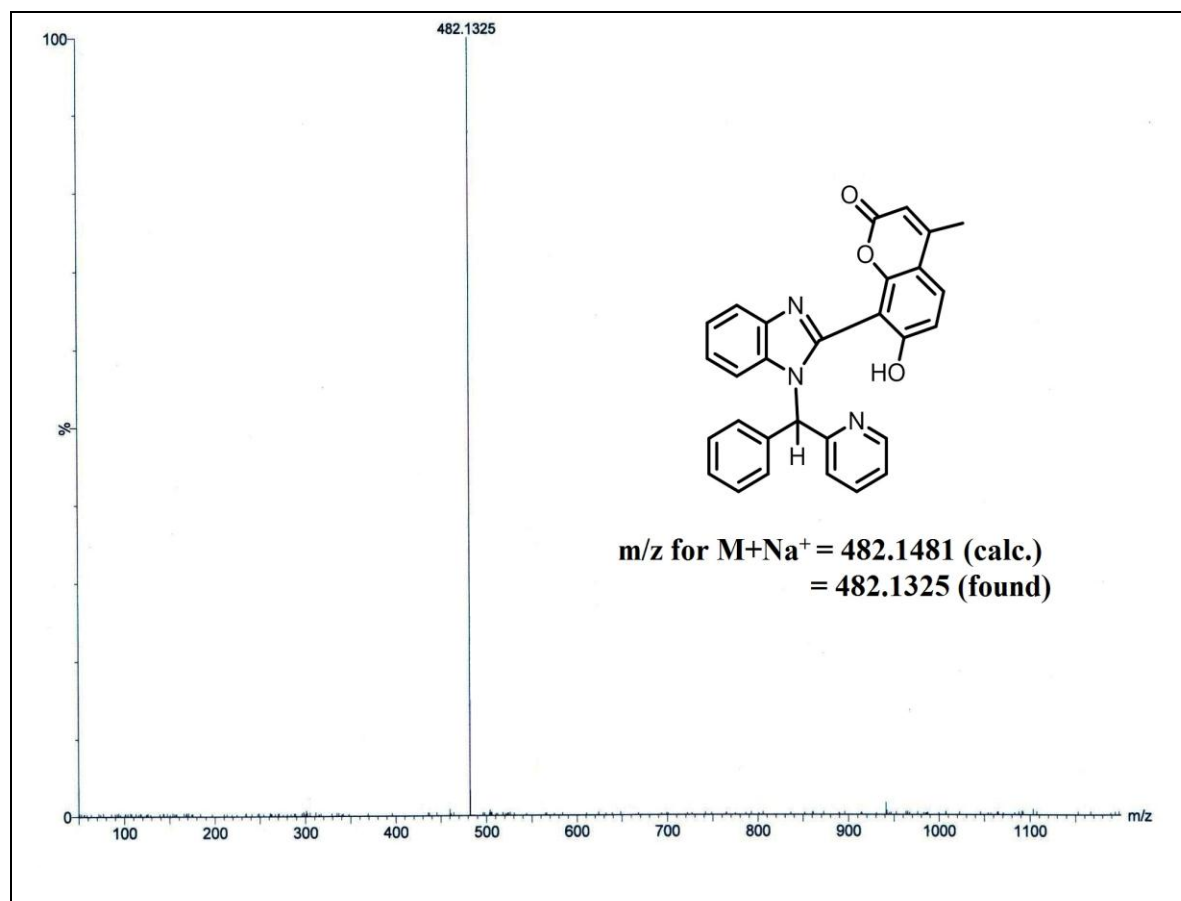

**Fig. S3** ESI- MS spectrum of **L**.

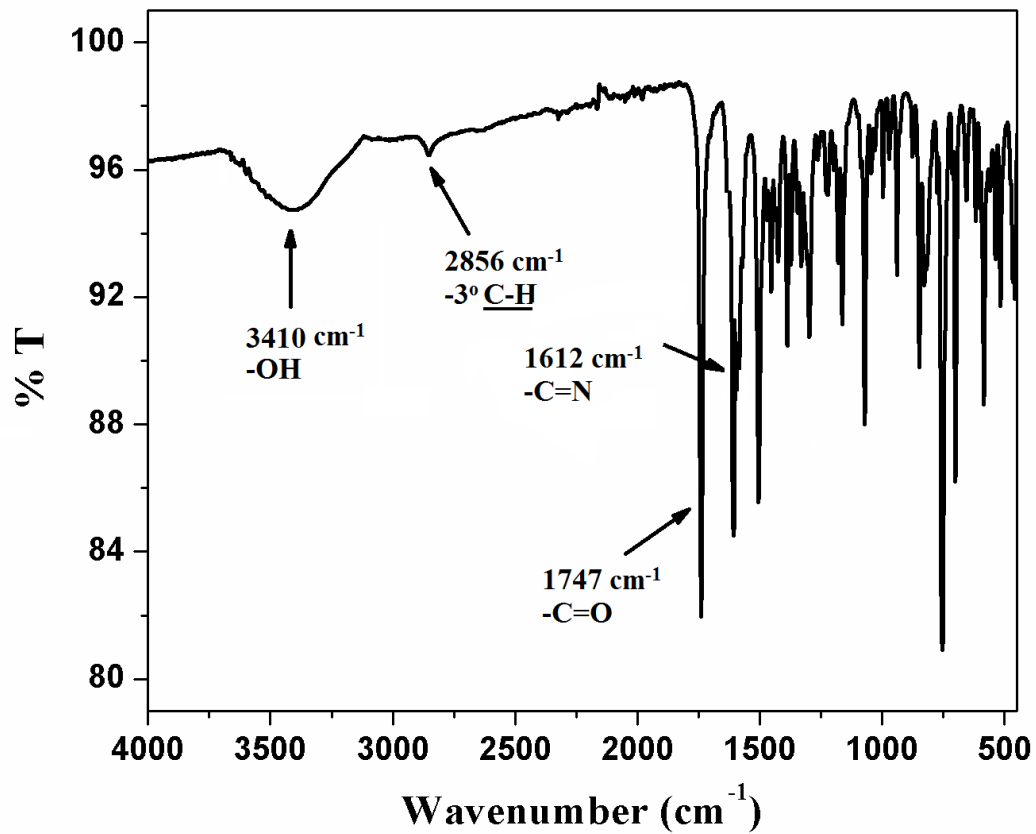

Fig. S4 FT-IR Spectrum of L.

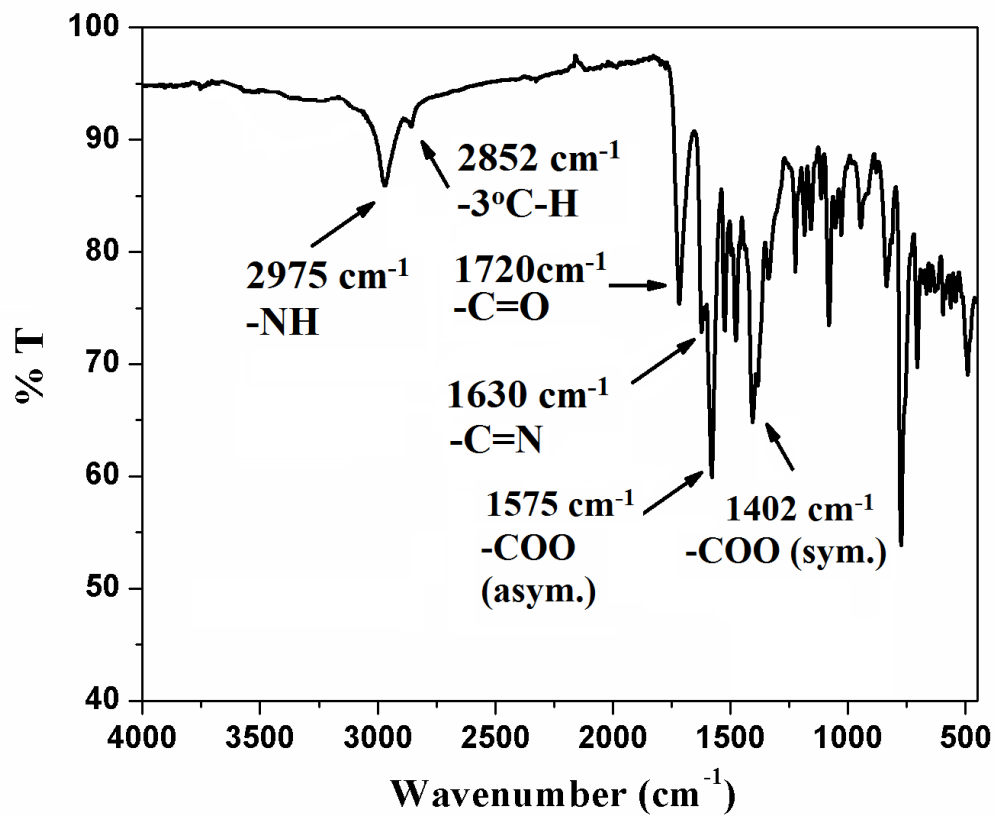

Fig. S5 FT-IR spectrum of [Zn(L')OAc] complex.

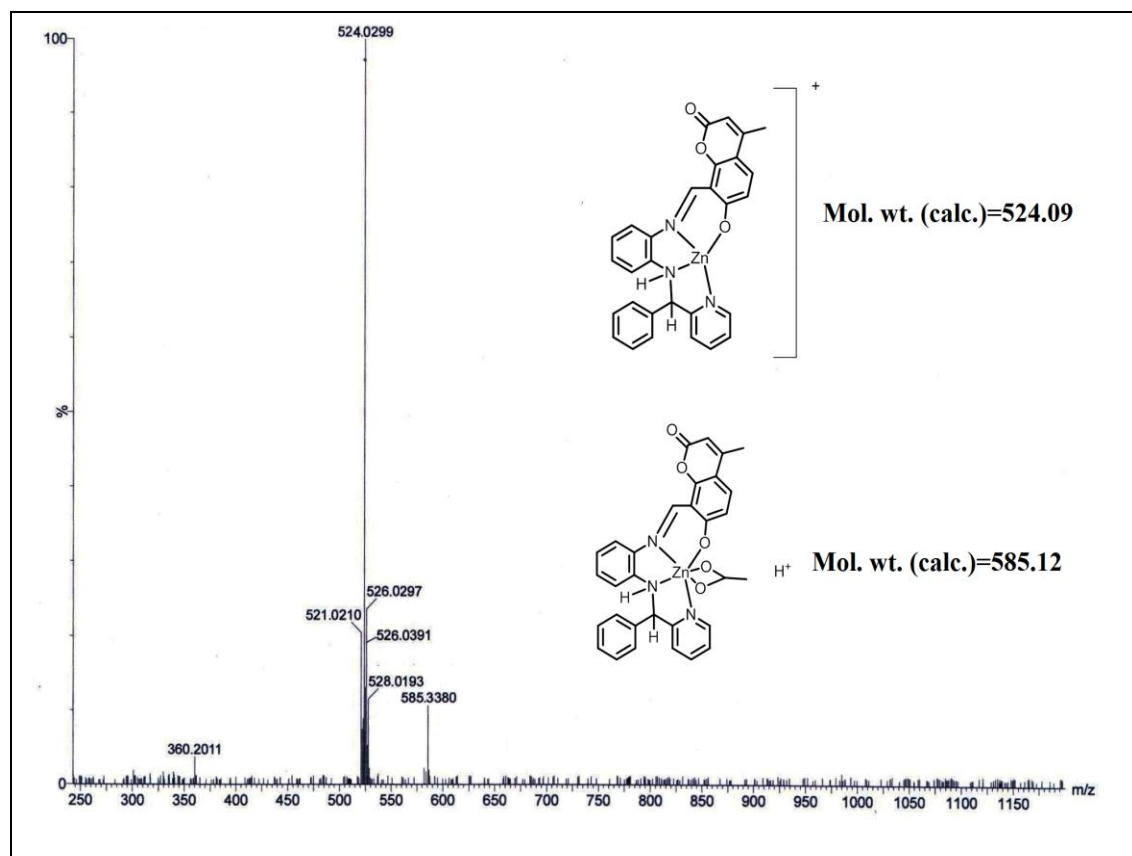

**Fig. S6** ESI-MS spectrum of [Zn(L')OAc] complex.

**Table S1** Crystal data and refinement parameters for ligand, **L**, [Cu(**L''**)Cl] and [Cu(**L''**)ClO<sub>4</sub>]

|                                            | <b>L</b>                                                      | [Cu( <b>L''</b> )Cl]                                                                          | [Cu( <b>L''</b> )ClO <sub>4</sub> ]                               |
|--------------------------------------------|---------------------------------------------------------------|-----------------------------------------------------------------------------------------------|-------------------------------------------------------------------|
| Formula                                    | C <sub>29</sub> H <sub>21</sub> N <sub>3</sub> O <sub>3</sub> | C <sub>33</sub> H <sub>28</sub> C <sub>13</sub> Cu <sub>2</sub> N <sub>3</sub> O <sub>4</sub> | C <sub>29</sub> H <sub>20</sub> ClCuN <sub>3</sub> O <sub>7</sub> |
| fw                                         | 459.49                                                        | 764.03                                                                                        | 621.47                                                            |
| Crystal System                             | monoclinic                                                    | monoclinic                                                                                    | monoclinic                                                        |
| Space group                                | P 21/c                                                        | C 2/c                                                                                         | P 21/n                                                            |
| a (Å)                                      | 9.5747(9)                                                     | 27.634(3)                                                                                     | 11.799(2)                                                         |
| b (Å)                                      | 16.6202(15)                                                   | 9.5387(9)                                                                                     | 15.054(2)                                                         |
| c (Å)                                      | 14.3006(13)                                                   | 27.062(3)                                                                                     | 14.475(2)                                                         |
| α/°                                        | 90                                                            | 90                                                                                            | 90                                                                |
| β/°                                        | 90.226(3)                                                     | 114.715(3)                                                                                    | 90.113(5)                                                         |
| γ/°                                        | 90                                                            | 90                                                                                            | 90                                                                |
| V (Å) <sup>3</sup>                         | 2275.7(4)                                                     | 6479.9(11)                                                                                    | 2571.2(7)                                                         |
| Z                                          | 4                                                             | 8                                                                                             | 4                                                                 |
| D <sub>c</sub> /g cm <sup>-3</sup>         | 1.341                                                         | 1.566                                                                                         | 1.605                                                             |
| μ/mm <sup>-1</sup>                         | 0.088                                                         | 1.602                                                                                         | 1.010                                                             |
| λ(Å)                                       | 0.71073                                                       | 0.71073                                                                                       | 0.71073                                                           |
| data[I > 2σ(I)]/params                     | 5033/318                                                      | 5703/407                                                                                      | 4505/ 371                                                         |
| GOF <sup>c</sup>                           | 1.078                                                         | 1.054                                                                                         | 1.080                                                             |
| final R indices [I > 2σ(I)] <sup>a,b</sup> | R1 = 0.0744<br>wR2 = 0.1458                                   | R1 = 0.0766<br>wR2 = 0.2502                                                                   | R1 = 0.1151<br>wR2 = 0.2463                                       |

<sup>a</sup>R<sub>1</sub> = Σ||F<sub>o</sub>| - |F<sub>c</sub>|| / Σ|F<sub>o</sub>|; <sup>b</sup>wR<sub>2</sub> = {Σ[w(F<sub>o</sub><sup>2</sup> - F<sub>c</sub><sup>2</sup>)<sup>2</sup>] / Σ[w(F<sub>o</sub><sup>2</sup>)<sup>2</sup>]}<sup>1/2</sup>; w = [σ<sup>2</sup>(F<sub>o</sub>)<sup>2</sup> + (0.1003P)<sup>2</sup> + 4.9693P]<sup>-1</sup> (F<sub>o</sub><sup>2</sup> + 2F<sub>c</sub><sup>2</sup>)/3; <sup>c</sup> Goodness-of-fit

**Table S2** Some important bond length and bond angles of **L**

| <b>Bond</b>           | <b>Length/Angle<br/>(Å/°)</b> | <b>Bond</b>           | <b>Angle (°)</b> |
|-----------------------|-------------------------------|-----------------------|------------------|
| O(1) - C(1)           | 1.353(3)                      | C(10) - N(2) - C(18)  | 125.9(2)         |
| N(1) - C(10)          | 1.317(4)                      | O(1) - C(1) - C(2)    | 121.7(3)         |
| N(2) - C(18)          | 1.472(4)                      | C(1) - C(2) - C(3)    | 120.7(3)         |
| C(1) - C(9)           | 1.391(4)                      | C(1) - C(9) - C(8)    | 117.7(3)         |
| C(18) - C(23)         | 1.527(4)                      | N(1) - C(10) - N(2)   | 113.0(2)         |
| C(24) - C(29)         | 1.364(4)                      | N(1) - C(12) - C(13)  | 129.7(3)         |
| N(4) - C(26)          | 1.342(5)                      | C(18) - C(23) - C(30) | 120.7(3)         |
| C(1) - C(2)           | 1.389(4)                      | N(4) - C(24) - C(29)  | 121.6(3)         |
| N(2) - C(17)          | 1.389(3)                      | C(1) - O(1) - H(1)    | 109              |
| C(18) - H(18)         | 0.98                          | N(2) - C(18) - H(18)  | 106              |
| O(1) - H(1)           | 0.82                          | C(10) - N(1) - C(12)  | 104.9(2)         |
| N(1) - C(12)          | 1.403(4)                      | O(1) - C(1) - C(9)    | 118.3(3)         |
| N(4) - C(24)          | 1.338(4)                      | C(1) - C(9) - C(10)   | 122.1(3)         |
| C(9) > C(10)          | 1.478(4)                      | N(1) - C(10) - C(9)   | 124.3(3)         |
| C(18) - C(24)         | 1.516(4)                      | N(1) - C(12) - C(17)  | 109.8(2)         |
| N(2) - C(10)          | 1.371(3)                      | N(2) - C(17) - C(12)  | 105.8(2)         |
| C(20) - C(19) - C(30) | 120.5(3)                      | N(2) - C(18) - C(23)  | 111.3(2)         |
| C(18) - C(24) - C(29) | 121.5(3)                      | C(1) - C(2) - H(2)    | 120              |
| C(10) - N(2) - C(17)  | 106.5(2)                      | C(24) - N(4) - C(26)  | 117.4(3)         |

|                       |          |                       |          |
|-----------------------|----------|-----------------------|----------|
| N(2) - C(10) - C(9)   | 122.7(2) | N(2) - C(17) - C(16)  | 132.3(3) |
| N(2) - C(18) - C(24)  | 110.4(2) | C(18) - C(23) - C(22) | 120.7(3) |
| N(4) - C(24) - C(18)  | 116.9(3) | N(4) - C(26) - C(27)  | 124.6(4) |
| C(24) - C(18) - H(18) | 106      | N(4) - C(26) - H(26)  | 118      |
| C(24) - C(29) - H(29) | 121      |                       |          |

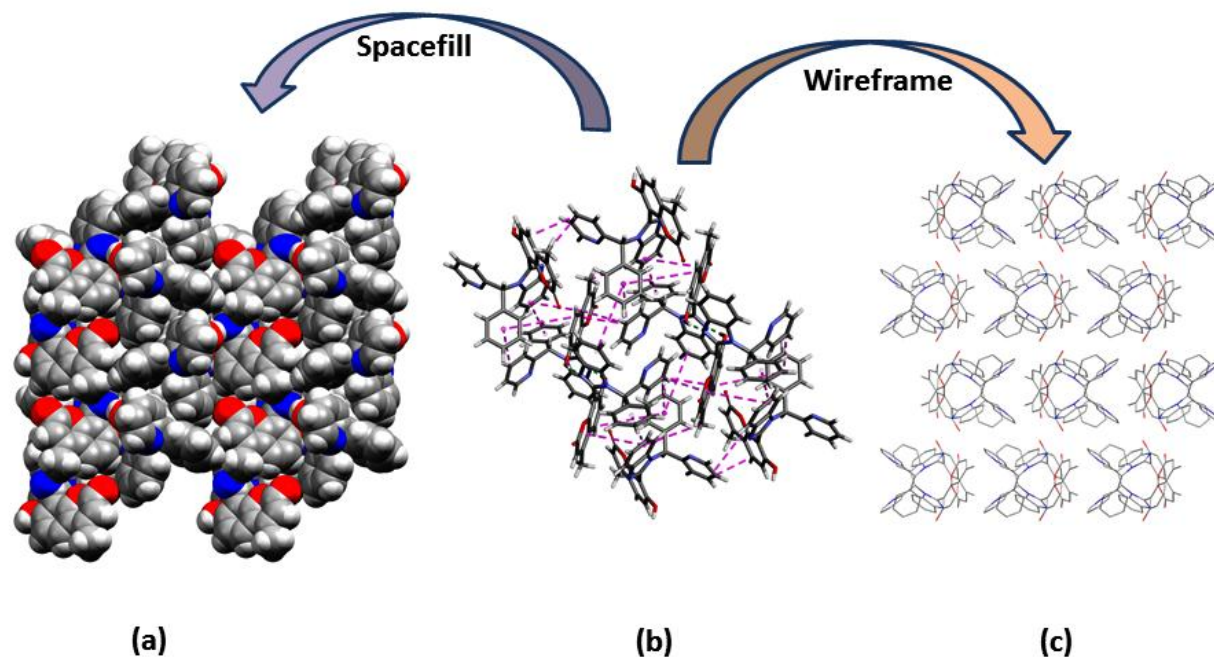

**Fig. S7** (a) spacefill view of supramolecular aggregated ligand, **L** along crystallographic axis 'c' (b) different supramolecular interactions presents in **L** (c) supramolecular assembly of **L** along 'c' crystallographic axis showing 'bee' like molecular arrangement.

**Table S3** Selected bond length and bond angles of [Cu(L'')Cl] complex

| <b>Bond</b>           | <b>Length/Angle<br/>(Å/°)</b> | <b>Bond</b>           | <b>Angle (°)</b> |
|-----------------------|-------------------------------|-----------------------|------------------|
| Cu(1) - Cl(1)         | 3.155(3)                      | Cl(2) - Cu(1) - N(1)  | 94.8(2)          |
| Cu(1) - N(2)          | 1.954(7)                      | O(2) - Cu(1) - N(1)   | 97.2(2)          |
| O(2) - C(1)           | 1.299(10)                     | N(1) - Cu(1) - N(2)   | 81.9(2)          |
| N(1) - C(25)          | 1.356(9)                      | C(11) - N(3) - C(12)  | 122.9(6)         |
| N(3) - C(11)          | 1.282(10)                     | N(3) - C(12) - C(17)  | 116.4(6)         |
| C(10) - C(11)         | 1.433(10)                     | N(2) - C(17) - C(12)  | 112.6(6)         |
| C(18) > C(25)         | 1.476(12)                     | N(2) - C(18) - C(19)  | 126.8(8)         |
| Cu(1) - Cl(2)         | 2.556(7)                      | C(18) - C(19) - C(20) | 118.7(7)         |
| Cu(1) - N(3)          | 1.931(6)                      | N(1) - C(25) - C(26)  | 120.8(8)         |
| N(1) - C(29)          | 1.347(10)                     | C(1) - C(2) - H(2)    | 119              |
| N(3) - C(12)          | 1.424(9)                      | N(3) - C(11) - H(11)  | 118              |
| C(12) - C(13)         | 1.386(11)                     | C(1) - C(10) - C(9)   | 117.1(7)         |
| Cu(1) - O(2)          | 1.879(5)                      | N(3) - C(11) - C(10)  | 124.9(8)         |
| Cu(2) - Cl(1)         | 2.108(4)                      | N(2) - C(17) - C(16)  | 126.9(7)         |
| N(2) - C(17)          | 1.447(11)                     | N(2) - C(18) - C(25)  | 113.6(7)         |
| C(1) - C(2)           | 1.417(10)                     | C(18) - C(19) - C(24) | 121.6(7)         |
| C(12) - C(17)         | 1.417(10)                     | C(18) - C(25) - C(26) | 123.7(7)         |
| C(11) - H(11)         | 0.93                          | C(10) - C(11) - H(11) | 118              |
| Cu(1) - N(1)          | 1.979(6)                      | C(1) - C(10) - C(11)  | 124.8(7)         |
| N(2) - C(18)          | 1.293(11)                     | N(3) - C(12) - C(13)  | 124.8(6)         |
| C(1) - C(10)          | 1.421(11)                     | C(12) - C(13) - C(14) | 120.0(8)         |
| C(18) > C(19)         | 1.491(11)                     | C(12) - C(17) - C(16) | 120.5(8)         |
| C(25) - C(26)         | 1.366(13)                     | N(1) - C(25) - C(18)  | 115.5(7)         |
| N(1) - C(29) - C(28)  | 122.1(7)                      | C(25) - C(26) - C(27) | 119.3(8)         |
| C(12) - C(13) - H(13) | 120                           | C(25) - C(26) - H(26) | 120              |
| N(1) - C(29) - H(29)  | 119                           |                       |                  |



**Table S4** Selected bond length and bond angles of [Cu(L'')(ClO<sub>4</sub>)] complex

| <b>Bond</b>          | <b>Length/Angle (Å/°)</b> | <b>Bond</b>          | <b>Length/Angle (Å/°)</b> |
|----------------------|---------------------------|----------------------|---------------------------|
| Cu(1) - O(1)         | 1.855(6)                  | O(1) - Cu(1) - O(5)  | 94.0(4)                   |
| Cu(1) - N(3)         | 1.915(7)                  | O(1) - Cu(1) - N(3)  | 97.2(3)                   |
| N(2) - C(18)         | 1.322(12)                 | N(2) - Cu(1) - N(3)  | 84.0(3)                   |
| C(18) > C(19)        | 1.472(15)                 | Cu(1) - O(5) - Cl(1) | 142.3(8)                  |
| O(1) - C(1)          | 1.309(11)                 | C(7) - N(3) - C(12)  | 124.0(8)                  |
| N(1) - C(19)         | 1.340(13)                 | N(3) - C(7) - C(6)   | 126.2(8)                  |
| N(3) - C(7)          | 1.304(12)                 | N(3) - C(12) - C(17) | 116.4(9)                  |
| C(18) > C(24)        | 1.465(15)                 | N(2) - C(17) - C(12) | 112.2(9)                  |
| Cu(1) - N(1)         | 1.977(7)                  | N(2) - C(18) - C(19) | 111.8(9)                  |
| N(1) - C(23)         | 1.314(13)                 | N(1) - C(19) - C(18) | 117.1(9)                  |
| N(3) - C(12)         | 1.396(13)                 | N(1) - C(23) - C(22) | 120.3(9)                  |
| Cu(1) - N(2)         | 1.925(8)                  | O(1) - Cu(1) - N(1)  | 96.2(3)                   |
| N(2) - C(17)         | 1.417(13)                 | N(1) - Cu(1) - N(2)  | 82.5(3)                   |
| Cu(1) - O(1) - C(1)  | 126.6(6)                  | Cu(1) - N(1) - C(19) | 111.0(6)                  |
| Cu(1) - N(2) - C(17) | 114.3(6)                  | Cu(1) - N(3) - C(7)  | 123.0(6)                  |
| O(1) - C(1) - C(2)   | 118.7(8)                  | N(2) - C(17) - C(16) | 126.7(9)                  |
| N(2) - C(18) - C(24) | 127.6(9)                  | N(1) - C(19) - C(20) | 119.6(9)                  |
| N(3) - C(7) - H(7)   | 117                       | N(1) - C(23) - H(23) | 120                       |
| O(1) - Cu(1) - N(2)  | 178.1(3)                  | N(1) - Cu(1) - N(3)  | 165.9(3)                  |
| Cu(1) - N(1) - C(23) | 126.4(7)                  | Cu(1) - N(2) - C(18) | 116.2(7)                  |
| Cu(1) - N(3) - C(12) | 113.1(6)                  | O(1) - C(1) - C(6)   | 122.1(9)                  |

|                       |          |                       |           |
|-----------------------|----------|-----------------------|-----------|
| C(18) - C(19) - C(20) | 123.3(9) | C(18) - C(24) - C(29) | 120.8(10) |
|-----------------------|----------|-----------------------|-----------|

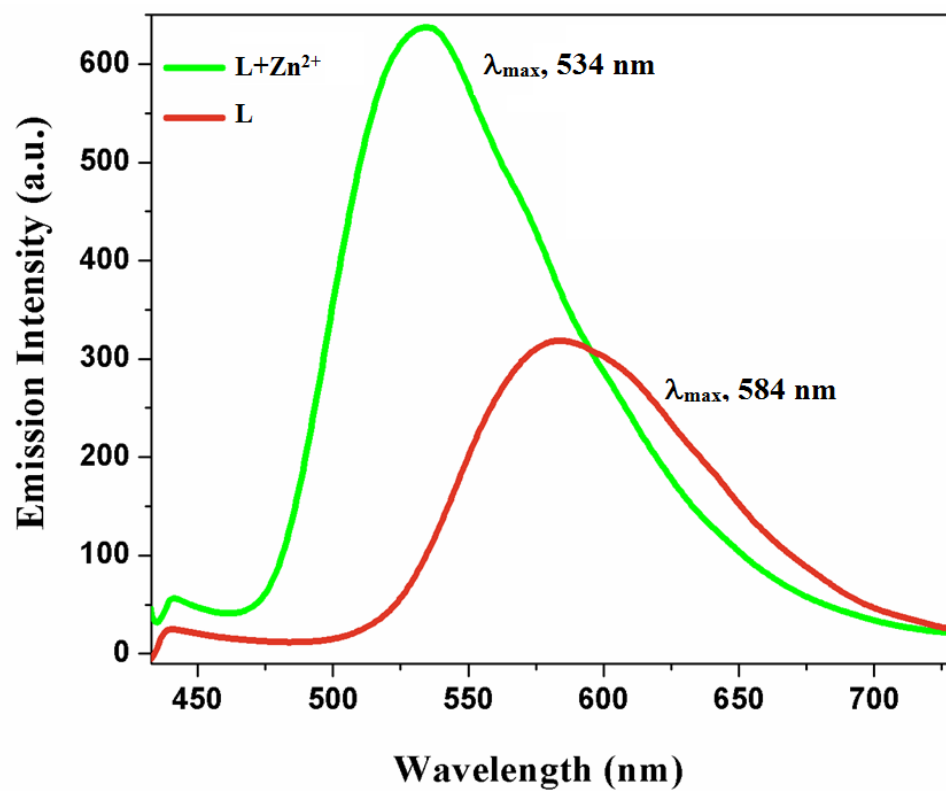

**Fig. S8** Solid state emission spectrum of the ligand, **L** and **L-Zn<sup>2+</sup>** complex ( $\lambda_{\text{ex}}$  400 nm, excitation slit 15 nm and emission slit 5 nm).

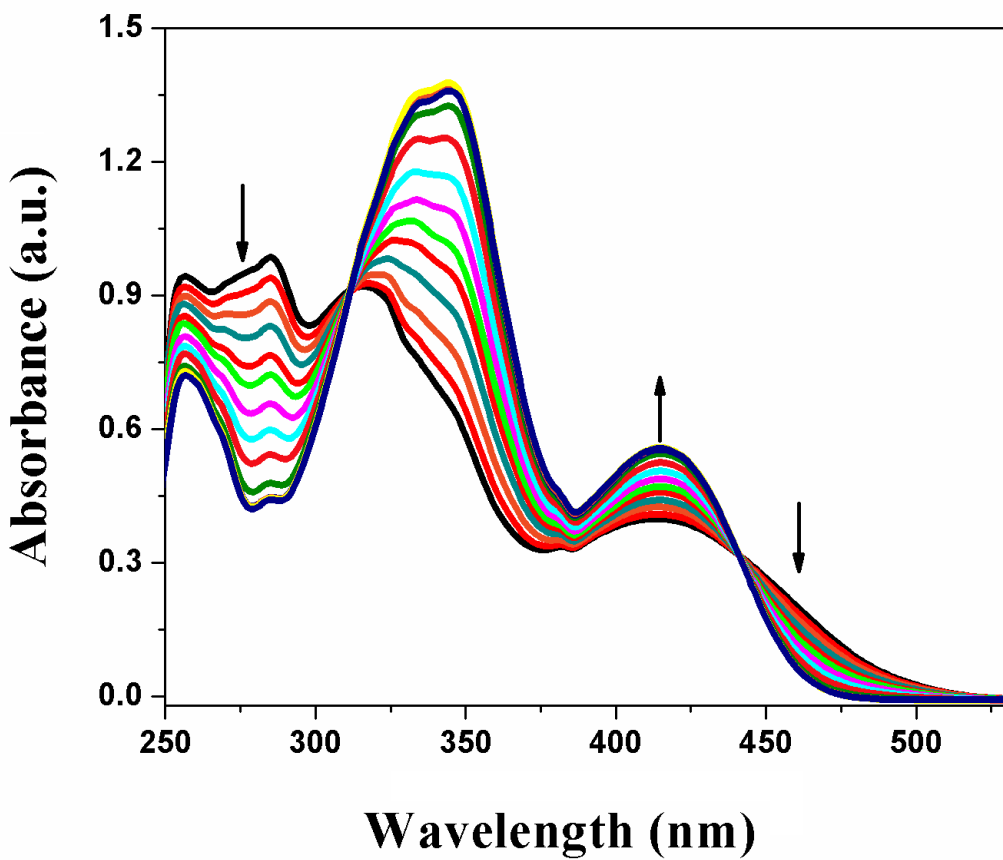

**Fig. S9** Absorbance spectral change of ligand, **L** on incremental addition of Zn<sup>2+</sup> ion in 9:1 (v/v) EtOH/H<sub>2</sub>O (HEPES buffer, pH 7.4).

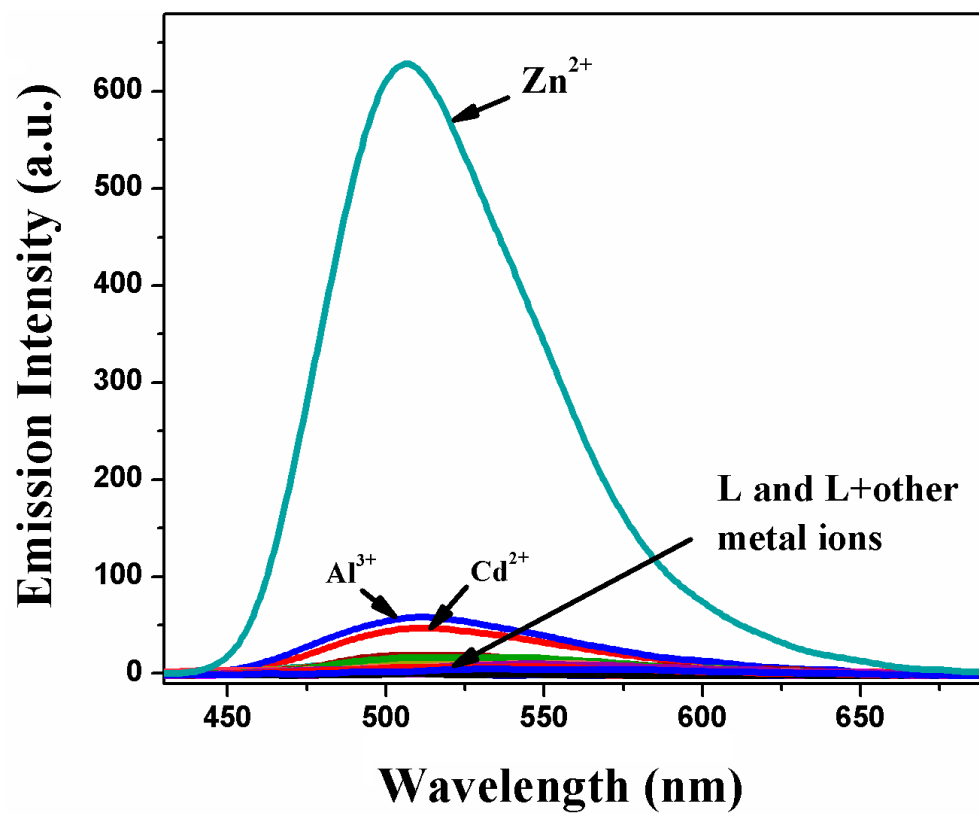

**Fig. S10** Fluorescence spectra of ligand, L in presence of various cations in 9:1 (v/v) EtOH/H<sub>2</sub>O (HEPES buffer, pH 7.4),  $\lambda_{\text{ex}}$ . 400 nm.

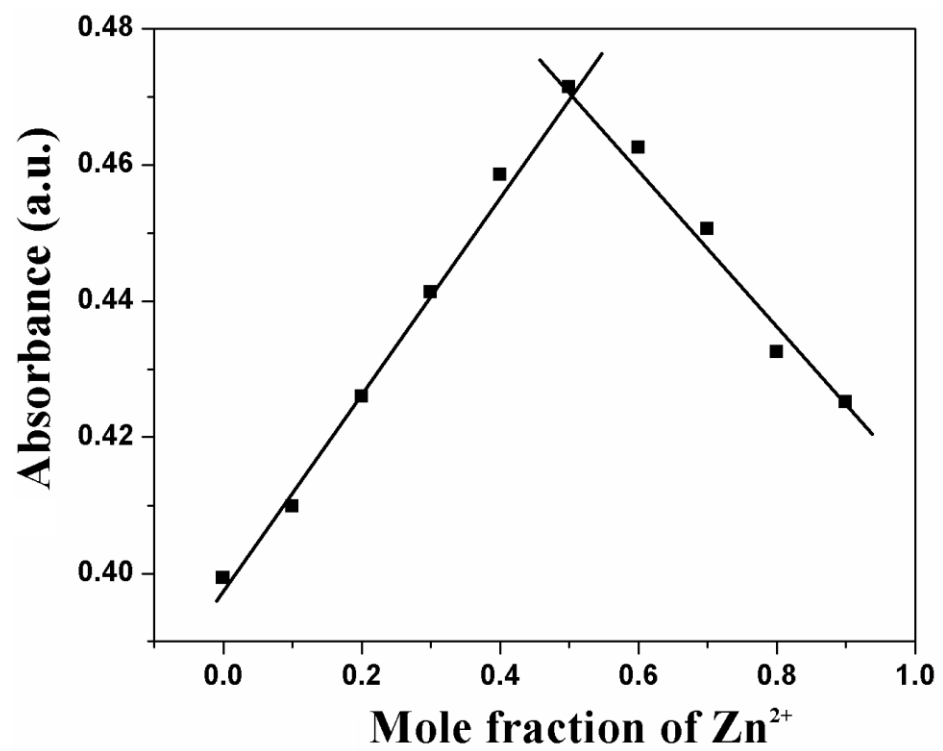

Fig. S11 Job's plot for binding stoichiometry determination in **L** with Zn<sup>2+</sup>.

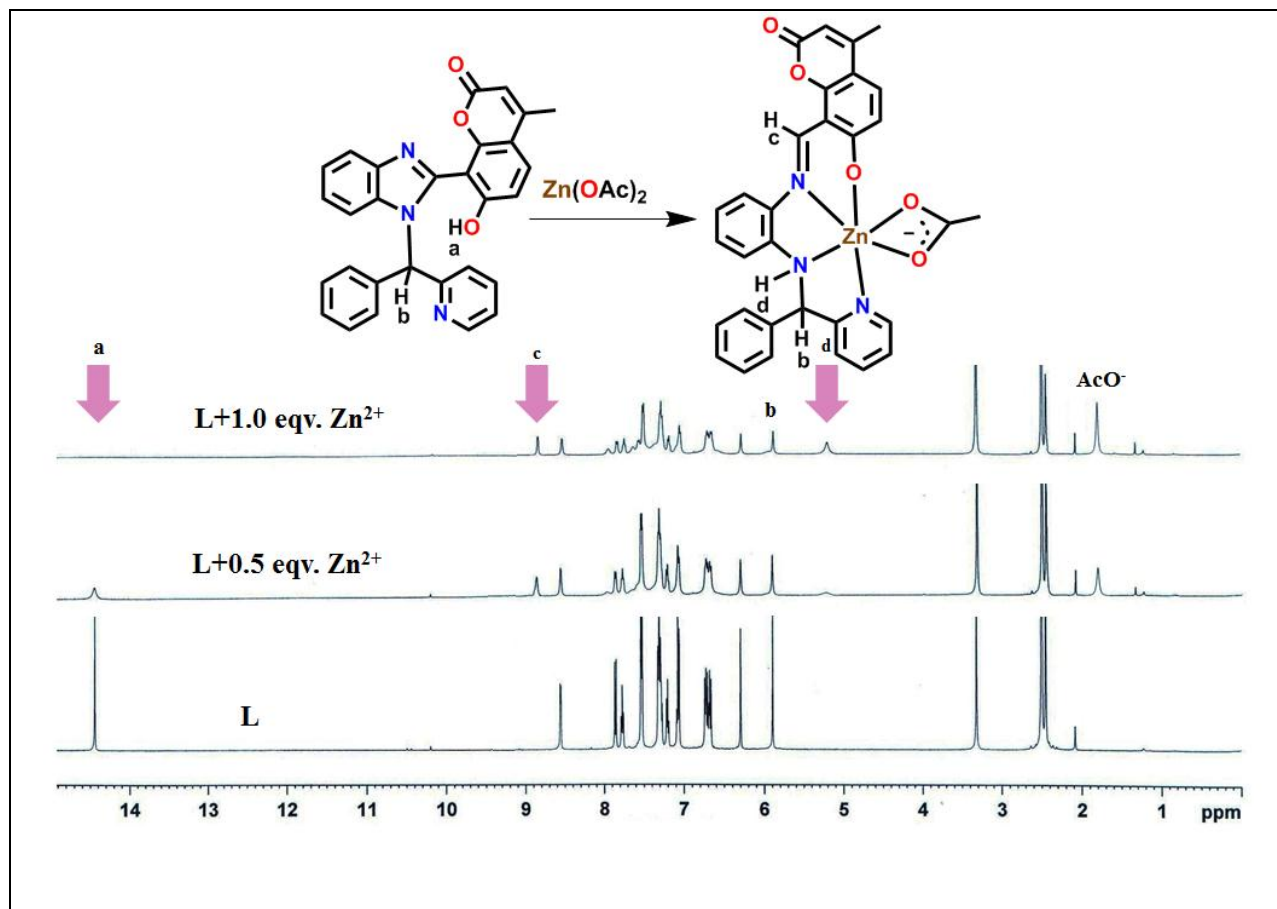

**Fig. S12**  $^1\text{H}$  NMR titration experiment in **L** with  $\text{Zn}^{2+}$  addition in  $\text{DMSO-d}_6$ .

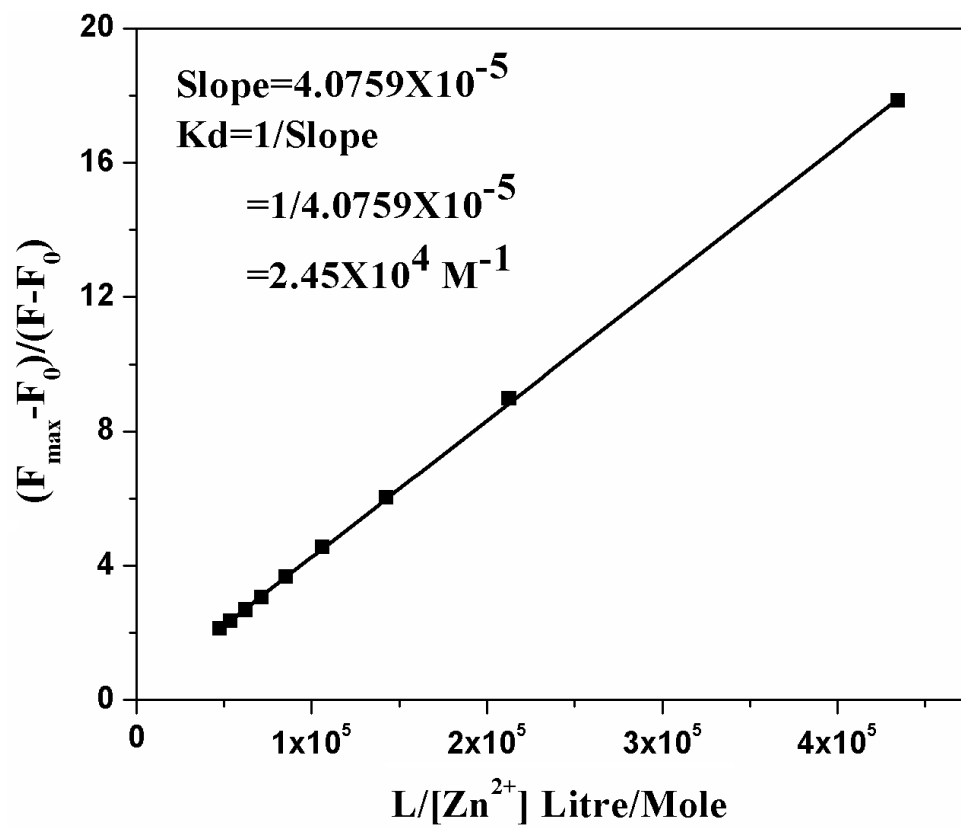

Fig. S13 Benesi-Hildebrand plot determining the binding constant of L with  $Zn^{2+}$ .

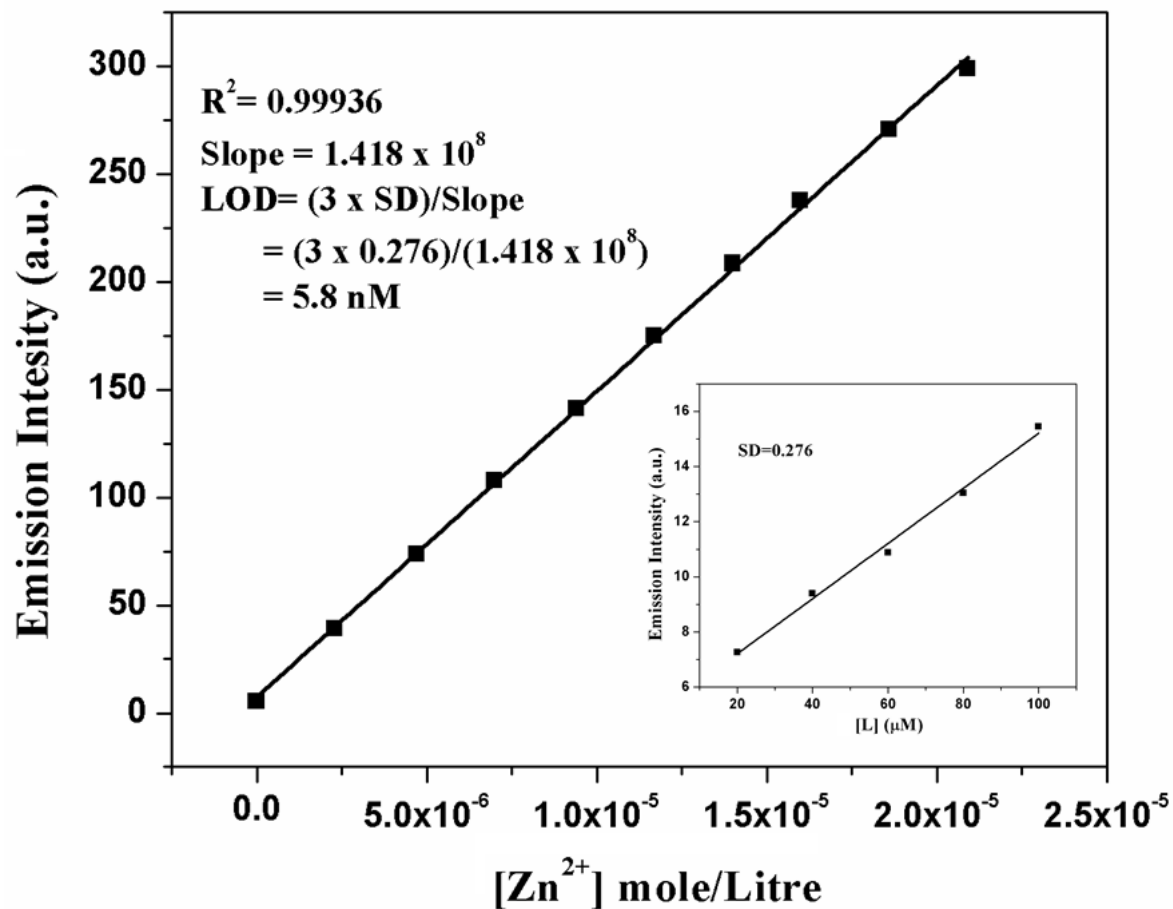

Fig. S14 LOD determination for  $\text{Zn}^{2+}$  ion.

Table S5 Some reports of coumarin derivative to ion sensitivity

| Sl. No. | Ligand | Selectivity (LOD)                                   | Solvent                                          | Solid state sensing Study | Live cell imaging | Ref. |
|---------|--------|-----------------------------------------------------|--------------------------------------------------|---------------------------|-------------------|------|
| 1.      |        | $\text{Zn}^{2+}$ (72 nM) and $\text{AcO}^-$ (94 nM) | DMSO/ $\text{H}_2\text{O}$<br>(v/v = 3:7)pH, 7.2 | No                        | Yes               | [7]  |



|    |                                                                                     |                                                          |                                                       |     |     |      |
|----|-------------------------------------------------------------------------------------|----------------------------------------------------------|-------------------------------------------------------|-----|-----|------|
| 2. | 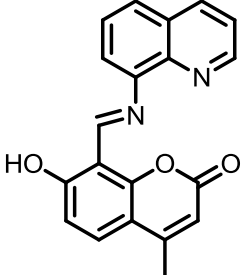   | Zn <sup>2+</sup> (100 nM)                                | THF                                                   | Yes | No  | [8]  |
| 3. |    | CN <sup>-</sup> (169 nM)<br>And Zn <sup>2+</sup> (61 nM) | DMSO/H <sub>2</sub> O<br>3:7, v/v                     | Yes | No  | [9]  |
| 4. |   | Zn <sup>2+</sup> (68 nM) and<br>ATP (6.7 μM)             | MeOH/H <sub>2</sub> O<br>(v/v, 2 : 1)                 | No  | Yes | [10] |
| 5. |  | Zn <sup>2+</sup> (78 nM) and<br>ATP (6.6 μM)             | MeOH/H <sub>2</sub> O<br>(v/v, 3:1)                   | No  | Yes | [11] |
| 6. |  | Zn <sup>2+</sup> (11 nM)                                 | 9 : 1 v/v<br>CH <sub>3</sub> CN :<br>H <sub>2</sub> O | Yes | Yes | [12] |

|     |                                                                                     |                                                         |                                                             |     |     |           |
|-----|-------------------------------------------------------------------------------------|---------------------------------------------------------|-------------------------------------------------------------|-----|-----|-----------|
| 7.  | 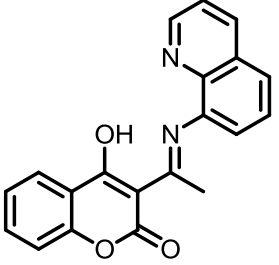   | Zn <sup>2+</sup> (-)                                    | CH <sub>3</sub> CN/H <sub>2</sub> O mixture (1:1, v/v)      | No  | No  | [13]      |
| 8.  |    | Zn <sup>2+</sup> (100 nM)                               | EPES buffer of PH 7.4                                       | No  | No  | [14]      |
| 9.  |    | Zn <sup>2+</sup> (35 nM)                                | CH <sub>3</sub> CN/H <sub>2</sub> O (95:5, v/v)             | No  | Yes | [15]      |
| 10. |   | Zn <sup>2+</sup> (19 nM) and Cu <sup>2+</sup> (1.87 nM) | CH <sub>3</sub> CN : H <sub>2</sub> O (1 : 1, v/v, pH, 7.2) | No  | No  | [16]      |
| 11. |  | Zn <sup>2+</sup> (26 nM) and ClO <sup>-</sup> (2 μM)    | 10 mM HEPES buffer (pH 7.4)                                 | No  | No  | [17]      |
| 12. |  | Zn <sup>2+</sup> (5.8 nM) and Cu <sup>2+</sup> (20 nM)  | 9:1, v/v EtOH/H <sub>2</sub> O                              | Yes | Yes | This work |

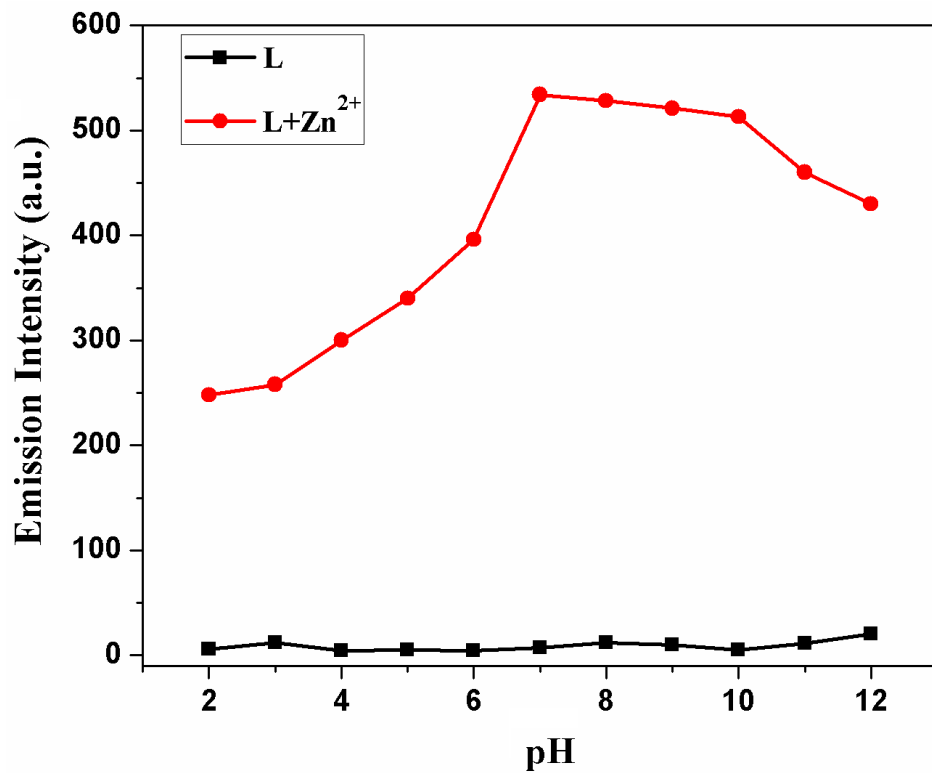

Fig. S15 pH dependency on Zn<sup>2+</sup> ion sensitivity.

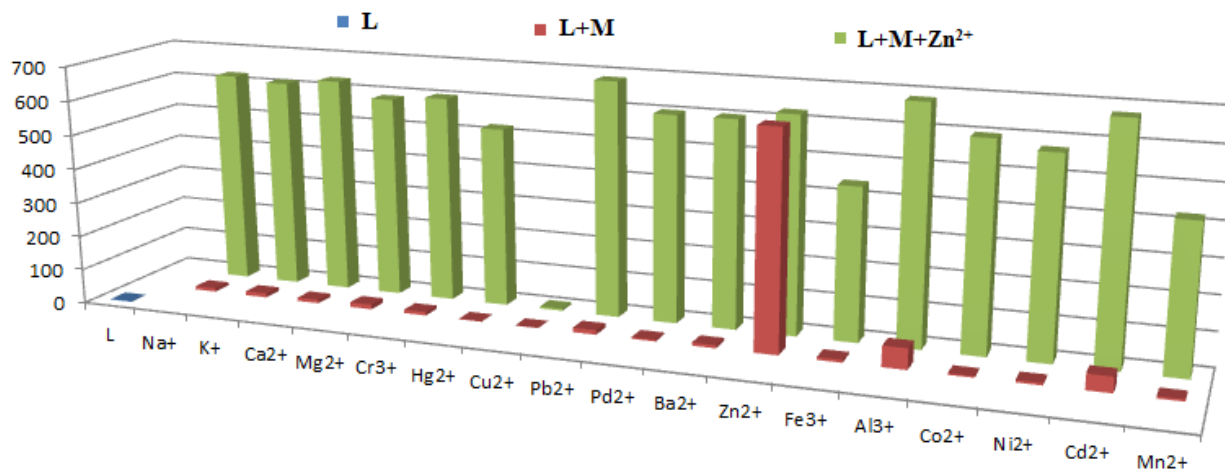

Fig. S16 Interference study on Zn<sup>2+</sup> ion sensitivity (M= different metal ions present in 3 eqv.)

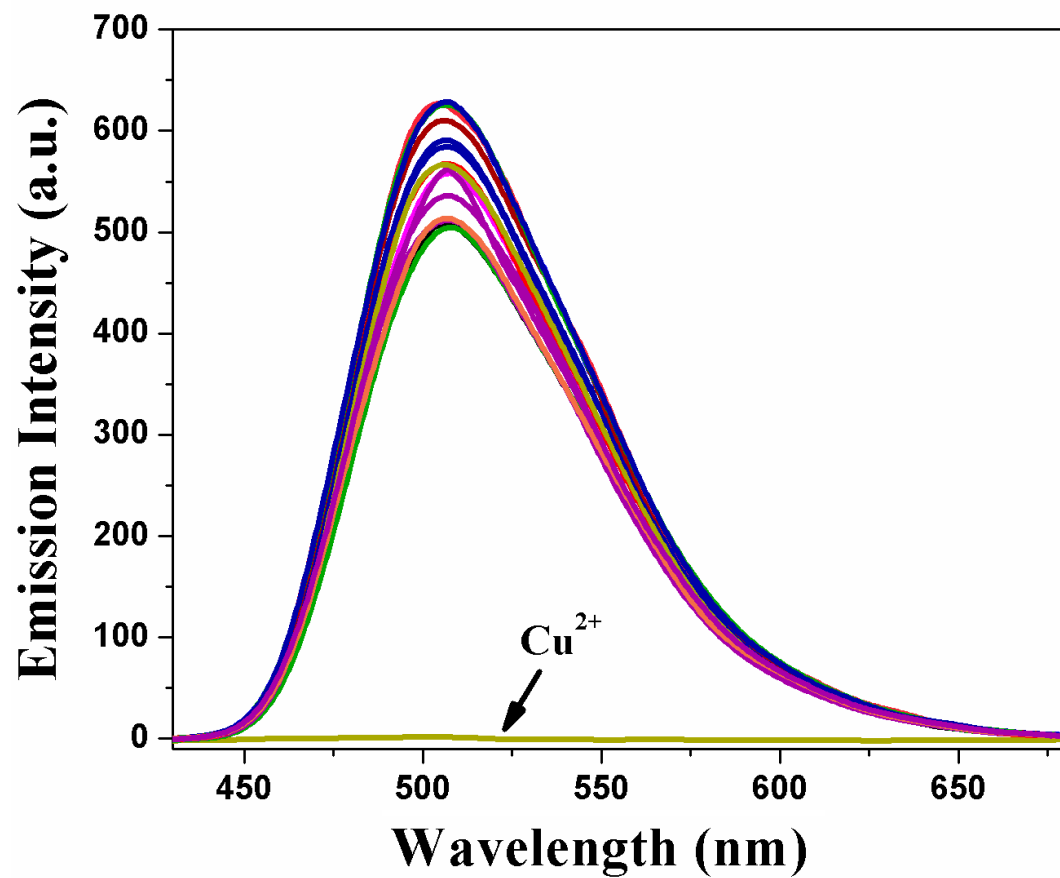

(a)

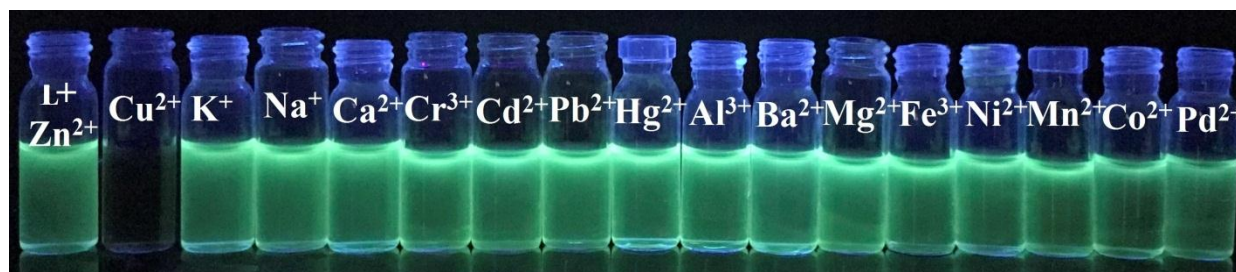

(b)

**Fig. S17** (a) Fluorescence spectra of ligand, **L** in absence and presence of various metal cations in 9:1 (v/v) EtOH/H<sub>2</sub>O (HEPES buffer, pH 7.4) (b) vial image in normal light under UV light, 365 nm.

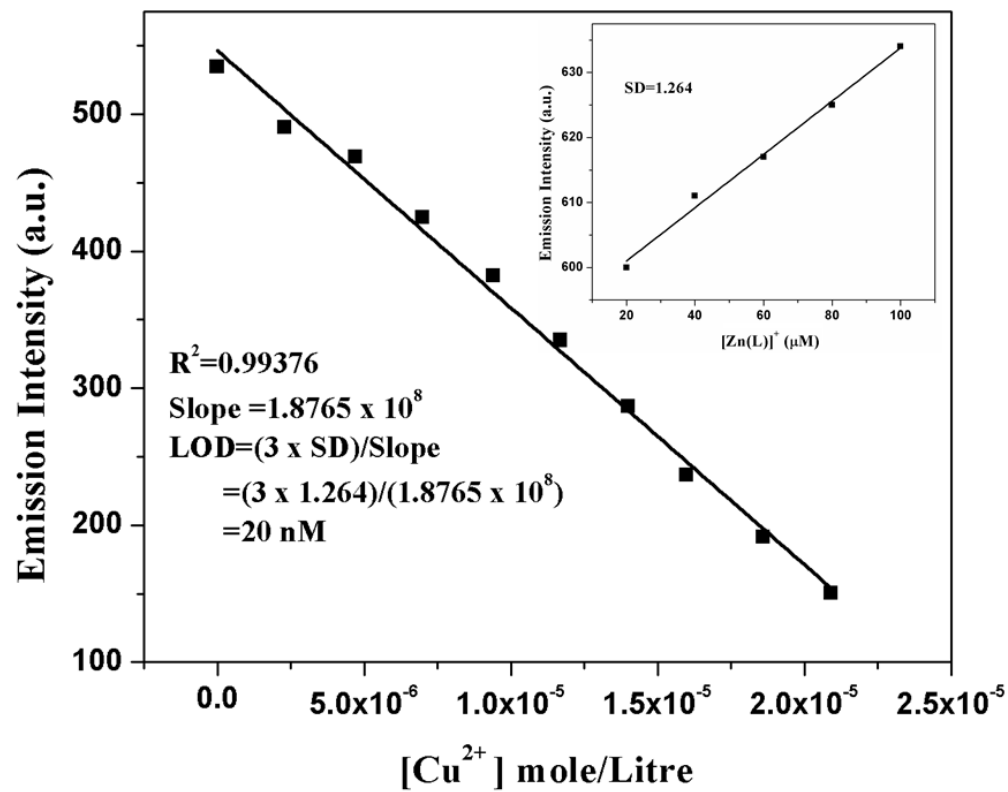

Fig. S18 LOD determination for Cu<sup>2+</sup> ion.

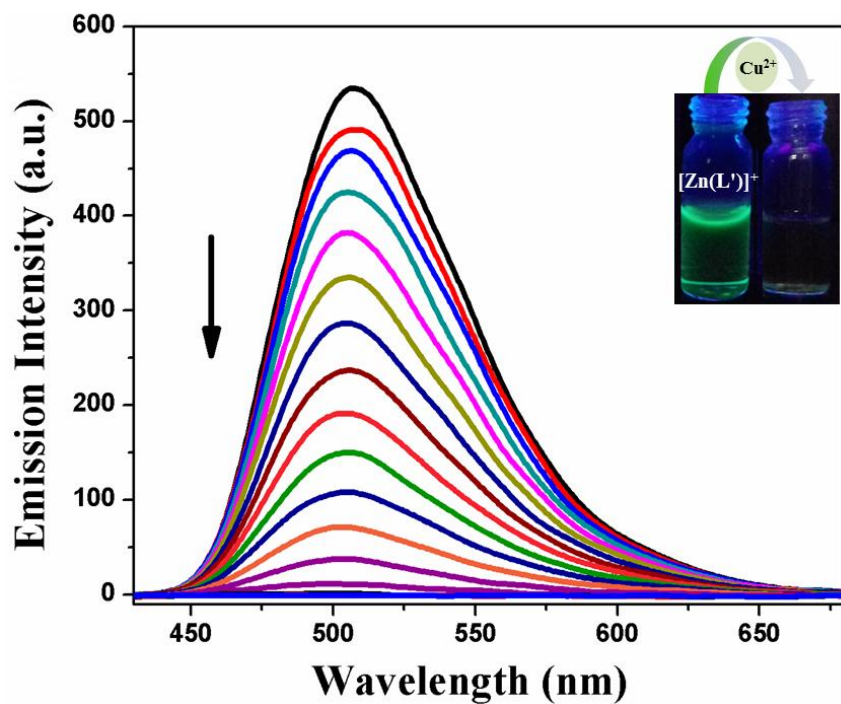

**Fig. S19** Fluorescence spectra of in-situ generated  $[\text{Zn}(\text{L}')\text{OAc}]$  complex on incremental addition of  $\text{Cu}^{2+}$  ion in 9:1 (v/v) EtOH/ $\text{H}_2\text{O}$  (HEPES buffer, pH 7.4),  $\lambda_{\text{ex}}$ . 400 nm.

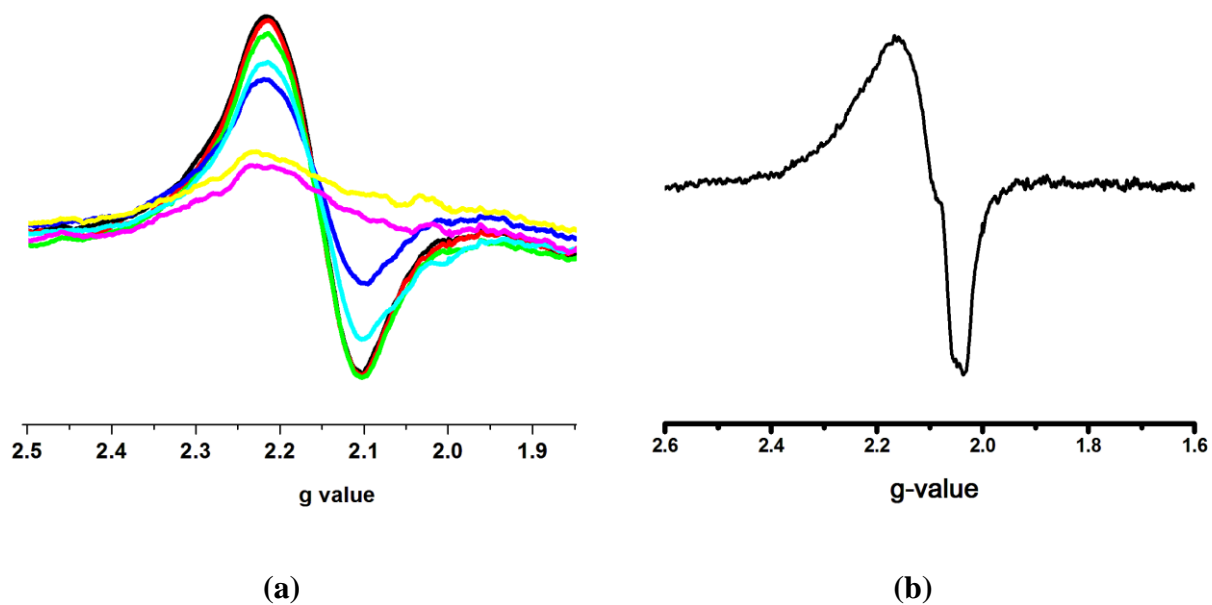

**Fig. S20** X- Band EPR spectra (a) gradual addition of  $[\text{Zn}(\text{L}')\text{OAc}]$  complex to  $\text{CuCl}_2$  solution in  $\text{CH}_3\text{CN}$  (b) isolated  $[\text{Cu}(\text{L}'')\text{Cl}]$  complex in  $\text{CH}_3\text{CN}$ .

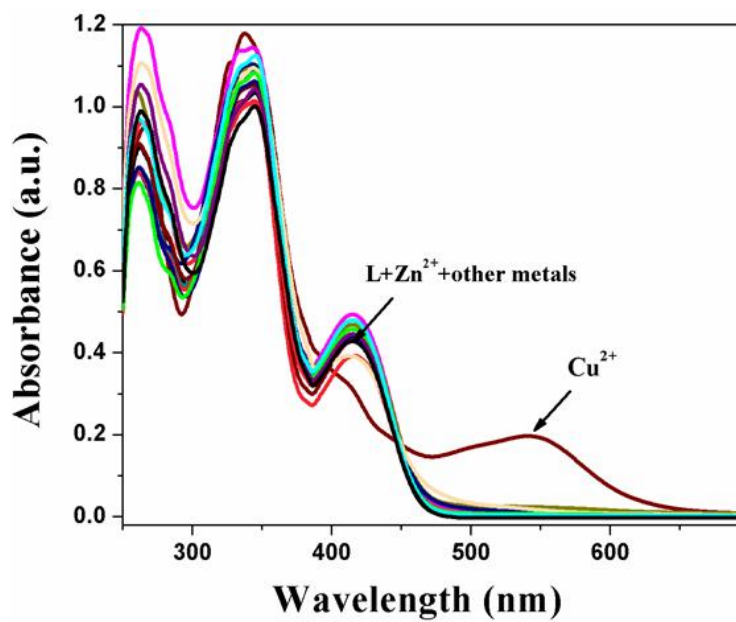

**a**

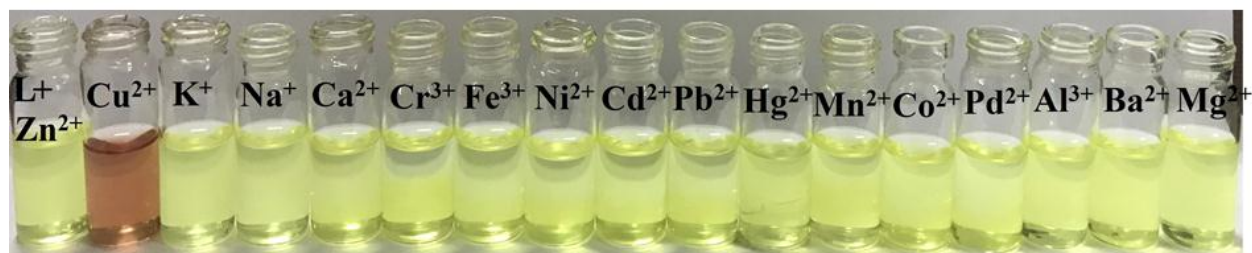

**b**

**Fig. S21** (a) Absorbance spectra of  $[\text{Zn}(\text{L}')\text{OAc}]$  complex in absence and presence of various metal cations in 9:1 (v/v) EtOH/ $\text{H}_2\text{O}$  (HEPES buffer, pH 7.4) (b) vial image in normal light.

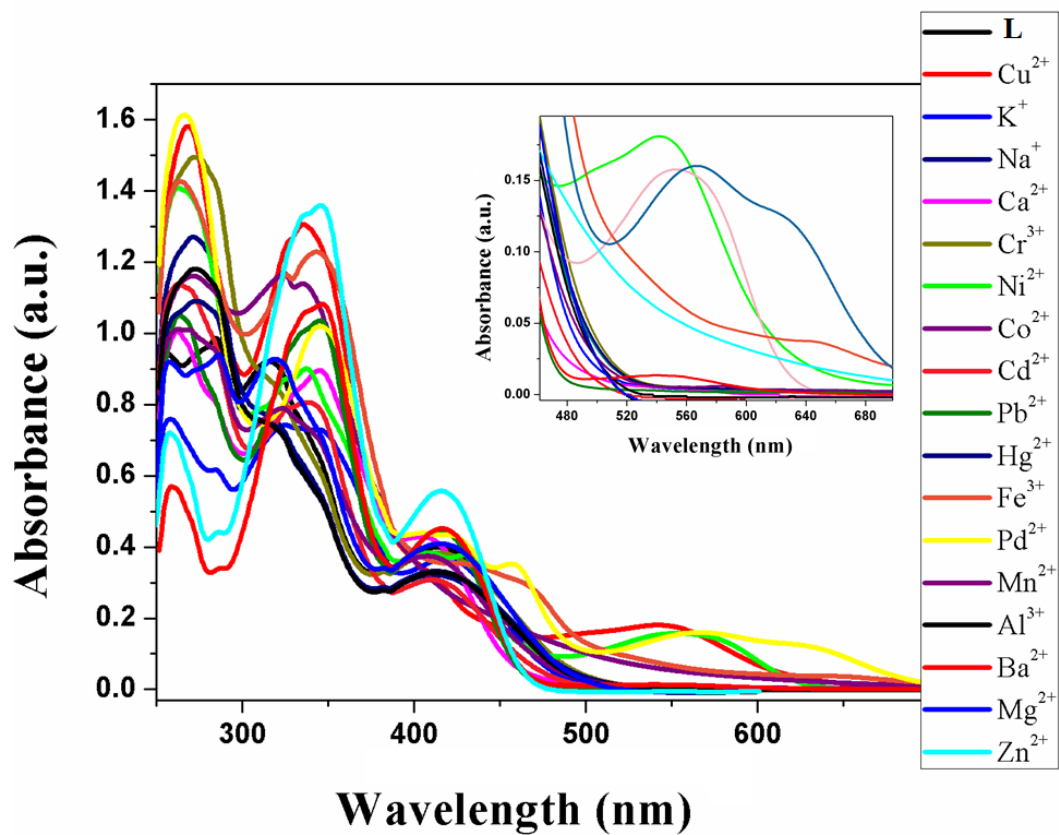

(a)

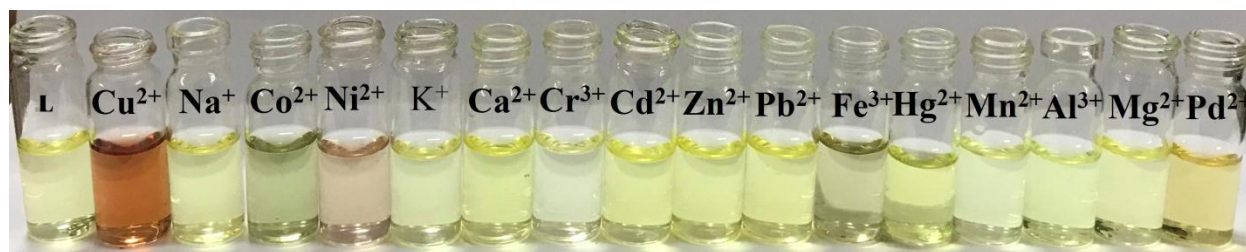

(b)

**Fig. S22** (a) Absorbance spectra of ligand, **L** in absence and presence of various metal cations in 9:1 (v/v) EtOH/H<sub>2</sub>O (HEPES buffer, pH 7.4; inset: zooming image at higher wavelength). (b) vial image in normal light.



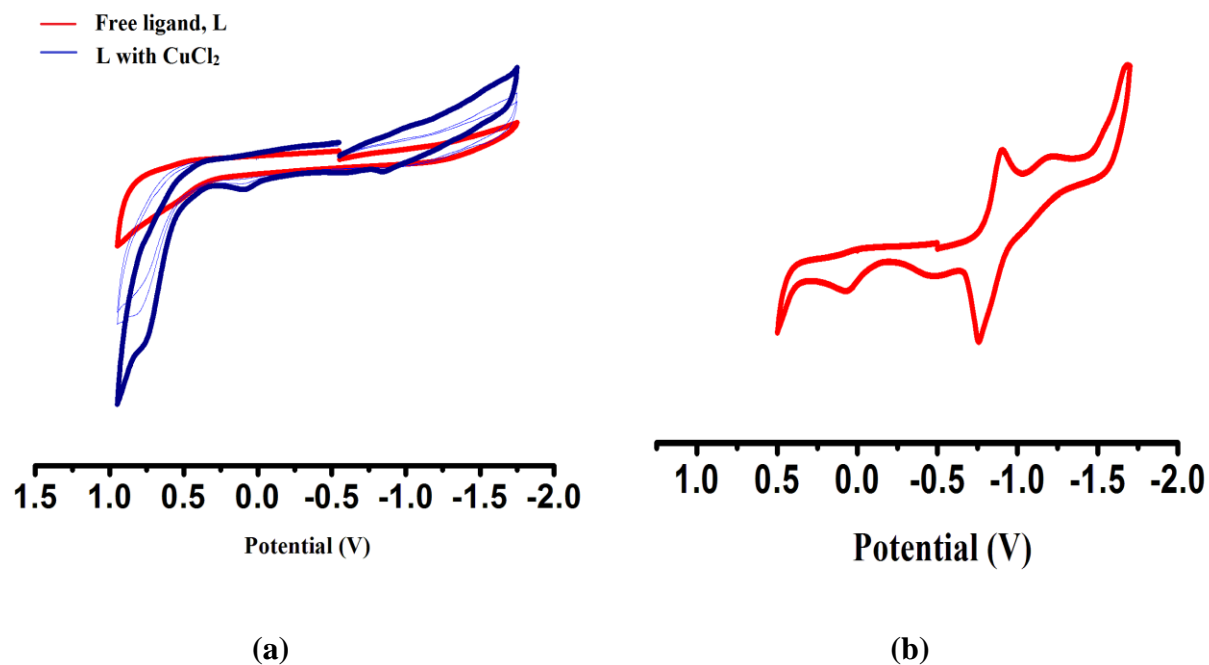

**Fig. S23** Cyclic voltammograms (a) **L** and **L** with addition of CuCl<sub>2</sub> in CH<sub>3</sub>CN in inert atmosphere (b) same solution (**L** and CuCl<sub>2</sub> in CH<sub>3</sub>CN) kept in air for 10 minutes then purged with N<sub>2</sub> gas at 296 K, (Conditions: 0.2 M [N(*n*-Bu)<sub>4</sub>]PF<sub>6</sub> supporting electrolyte; scan rate, 100 m V s<sup>-1</sup>; platinum working electrode).

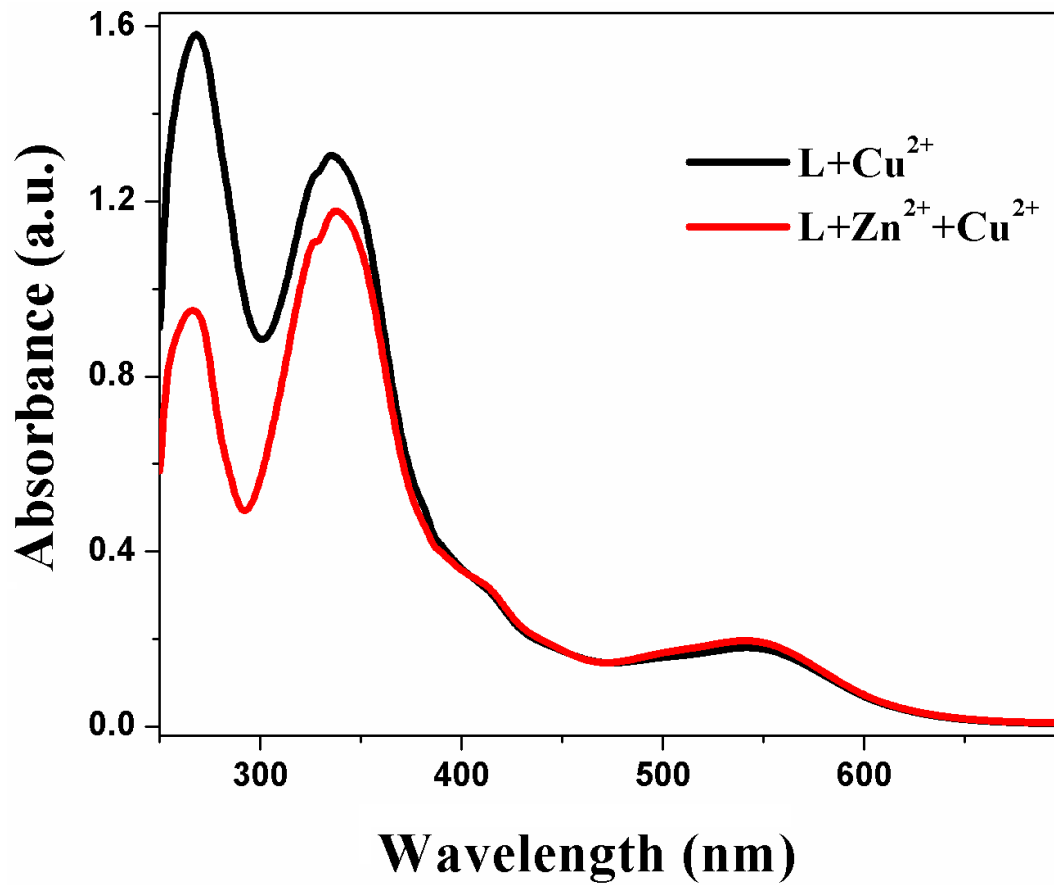

Fig. S24 Absorbance spectra of L+Cu<sup>2+</sup> and L+Zn<sup>2+</sup>+Cu<sup>2+</sup>.

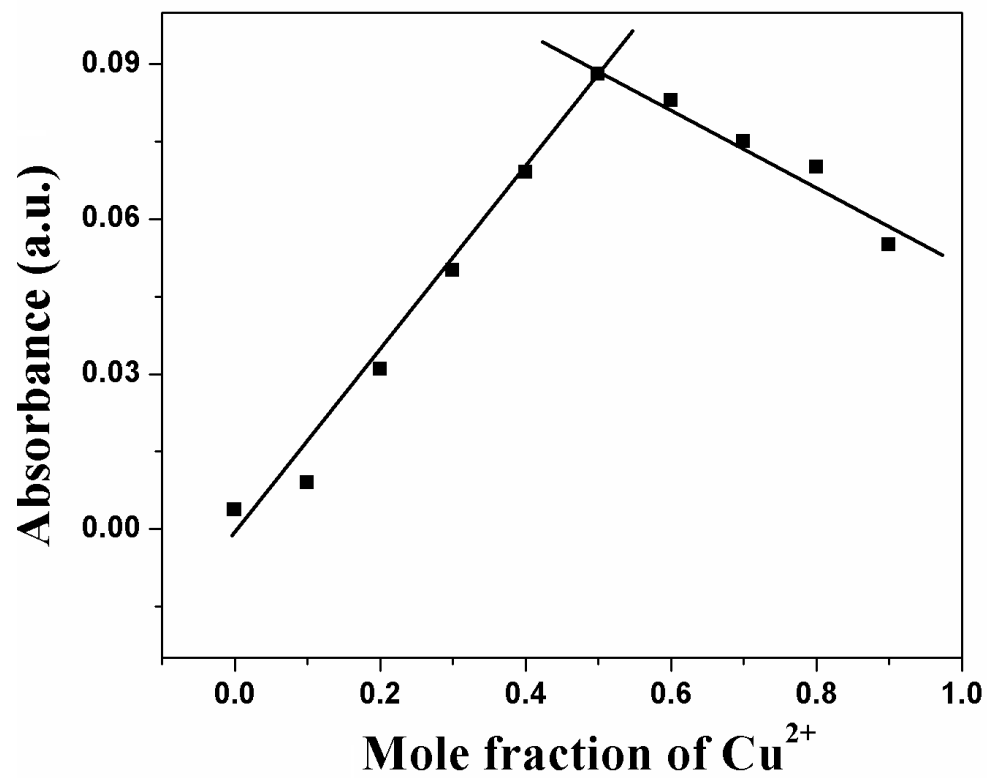

Fig. S25 Job's plot for binding stoichiometry determination for [Zn(L')OAc] with Cu<sup>2+</sup> ion.

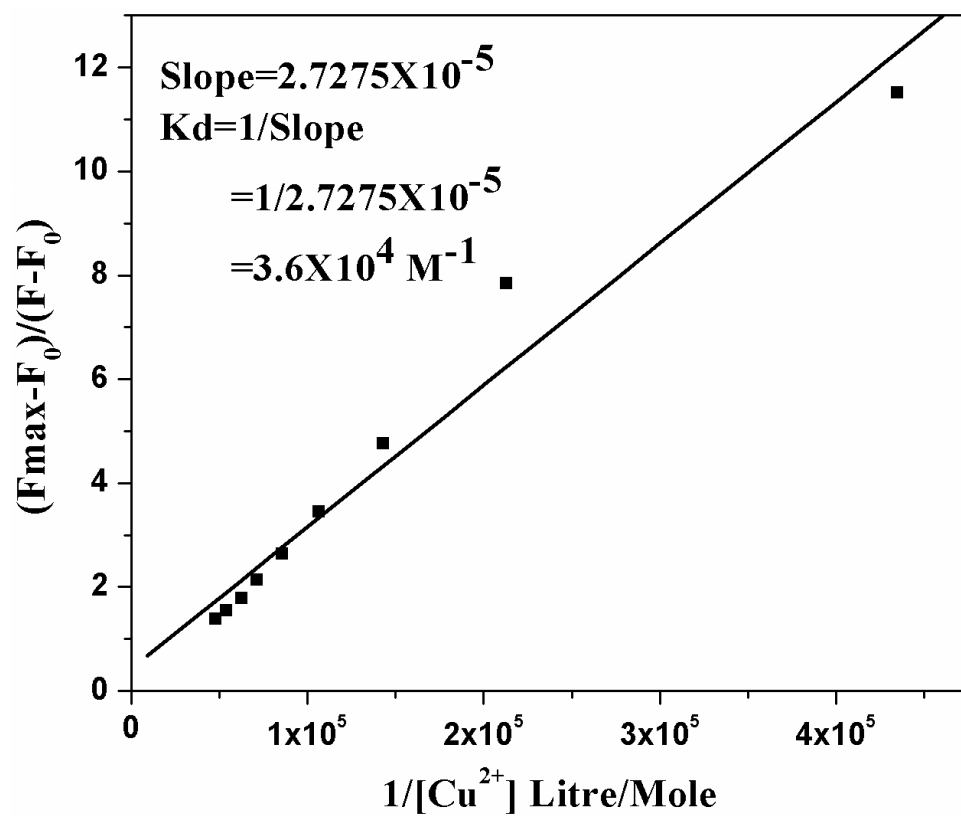

Fig. S26 binding constant for  $[\text{Cu}(\text{L}'')\text{Cl}]$  by Benesi-Hildebrand plot.

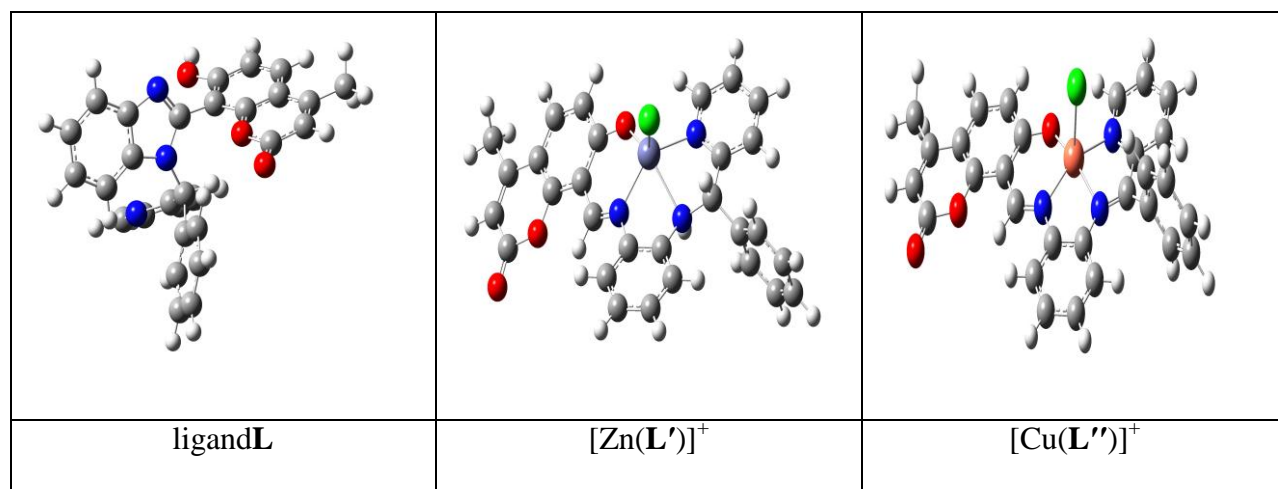

Fig. S27 DFT optimized structure of LigandL,  $[\text{Zn}(\text{L}')(\text{Cl})]$  and  $[\text{Cu}(\text{L}'')\text{Cl}]$  complex.

**Table S6** some frontier molecular orbitals and energies of the ligand **L**

|                                                                                    |                                                                                    |                                                                                    |                                                                                     |                                                                                      |
|------------------------------------------------------------------------------------|------------------------------------------------------------------------------------|------------------------------------------------------------------------------------|-------------------------------------------------------------------------------------|--------------------------------------------------------------------------------------|
| 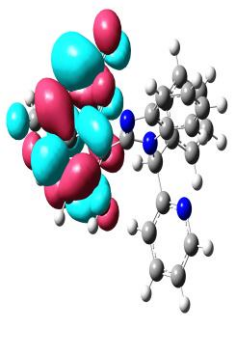  |   |   |   |   |
| LUMO<br>-2.03eV                                                                    | LUMO+1<br>-0.98eV                                                                  | LUMO+2<br>-0.75eV                                                                  | LUMO+3<br>-0.57eV                                                                   | LUMO+4<br>-0.22eV                                                                    |
|  |  |  |  |  |
| HOMO<br>-5.46 eV                                                                   | HOMO-1<br>-5.68 eV                                                                 | HOMO-2<br>-6.37 eV                                                                 | HOMO-3<br>-6.47 eV                                                                  | HOMO-4<br>-6.48 eV                                                                   |

**Table S7** some frontier molecular orbitals and energies of the [Zn(L')Cl] complex

|                                                                                     |                                                                                     |                                                                                     |                                                                                      |                                                                                       |
|-------------------------------------------------------------------------------------|-------------------------------------------------------------------------------------|-------------------------------------------------------------------------------------|--------------------------------------------------------------------------------------|---------------------------------------------------------------------------------------|
| 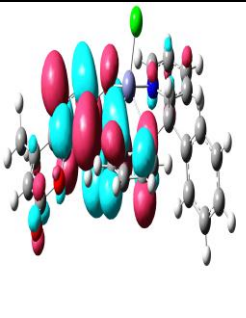 |  |  |  |  |
| LUMO<br>-2.15 eV                                                                    | LUMO+1<br>-1.99 eV                                                                  | LUMO+2<br>-1.68 eV                                                                  | LUMO+3<br>-1.44 eV                                                                   | LUMO+4<br>-1.07 eV                                                                    |

|                                                                                   |                                                                                   |                                                                                   |                                                                                    |                                                                                     |
|-----------------------------------------------------------------------------------|-----------------------------------------------------------------------------------|-----------------------------------------------------------------------------------|------------------------------------------------------------------------------------|-------------------------------------------------------------------------------------|
| 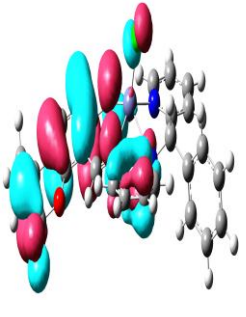 |  |  |  |  |
| HOMO<br>-5.67 eV                                                                  | HOMO-1<br>-6.31 eV                                                                | HOMO-2<br>-6.32 eV                                                                | HOMO-3<br>-6.37 eV                                                                 | HOMO-4<br>-6.84 eV                                                                  |

**Table S8** some frontier molecular orbitals and energies of the [Cu(L'')Cl] ( $\alpha$  spin)

|                                                                                     |                                                                                     |                                                                                     |                                                                                      |                                                                                       |
|-------------------------------------------------------------------------------------|-------------------------------------------------------------------------------------|-------------------------------------------------------------------------------------|--------------------------------------------------------------------------------------|---------------------------------------------------------------------------------------|
| 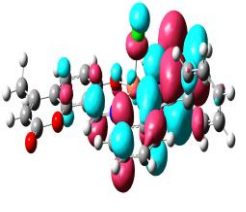   |    |    |    |    |
| LUMO<br>-3.06 eV                                                                    | LUMO+1<br>-2.3 eV                                                                   | LUMO+2<br>-1.76 eV                                                                  | LUMO+3<br>-1.69 eV                                                                   | LUMO+4<br>-1.04 eV                                                                    |
|  |  |  |  |  |
| HOMO<br>-5.41 eV                                                                    | HOMO-1<br>-5.44 eV                                                                  | HOMO-2<br>-5.55 eV                                                                  | HOMO-3<br>-5.98 eV                                                                   | HOMO-4<br>-6.46 eV                                                                    |

**Table S9** Possible electronic transitions on the ligand, **L** from TD-DFT calculation

| Excitation energy (eV) | Wavelength Exp. (nm) | Wavelength Thro. (nm) | Oscillation Frequency (f) | Key Transitions      | Nature of transition |
|------------------------|----------------------|-----------------------|---------------------------|----------------------|----------------------|
| 3.8211 eV              | 414                  | 324.47                | f=0.0087                  | HOMO-1→LUMO,<br>47 % | ILCT                 |
| 4.0784 eV              | 315                  | 304.01                | f=0.3682                  | HOMO-2→LUMO,<br>45 % | ILCT                 |

**Table S10** Possible electronic transitions on [Zn(L')Cl] complex from TD-DFT calculation

| Excitation energy (eV) | Wavelength Exp. (nm) | Wavelength Thro. (nm) | Oscillation Frequency (f) | Key Transitions   | Nature of transition      |
|------------------------|----------------------|-----------------------|---------------------------|-------------------|---------------------------|
| 3.1142 eV              | 414                  | 398.12                | f=0.2866                  | HOMO→LUMO, 43 %   | ILCT                      |
| 3.6763 eV              | 345                  | 337.26                | f=0.6726                  | HOMO-1→LUMO, 38 % | ILCT (Cl <sub>p</sub> →L) |

**Table S11** Possible electronic transition on [Cu(L'')Cl] complex from TD-DFT calculation

| Excitation energy (eV) | Wavelength Exp. (nm) | Wavelength Thro. (nm) | Oscillation Frequency (f) | Key Transitions         | Nature of transition      |
|------------------------|----------------------|-----------------------|---------------------------|-------------------------|---------------------------|
| 2.3342 eV              | 540                  | 531.17                | f=0.0260                  | HOMO→LUMO (α), 52 %     | ILCT (Cl <sub>p</sub> →L) |
| 3.6598 eV              | 345                  | 338.77                | f=0.1501                  | HOMO-5→LUMO+1 (α), 50 % | ILCT                      |

**Table S12** Optimized coordinates for ligand, L

| Center Number | Atomic Number | Coordinates (Angstroms) |          |          |
|---------------|---------------|-------------------------|----------|----------|
|               |               | X                       | Y        | Z        |
| 1             | 8             | 5.919369                | 7.872931 | 8.041695 |
| 2             | 1             | 5.833926                | 8.573460 | 8.716432 |
| 3             | 8             | 4.379652                | 3.586147 | 6.738146 |
| 4             | 7             | 6.961271                | 5.373320 | 5.655676 |
| 5             | 7             | 5.171905                | 6.655104 | 5.087898 |
| 6             | 8             | 3.758761                | 1.525175 | 6.013425 |
| 7             | 6             | 5.734815                | 5.932802 | 6.043439 |
| 8             | 6             | 5.120814                | 5.742444 | 7.375384 |
| 9             | 6             | 4.384764                | 4.590535 | 7.689995 |
| 10            | 6             | 5.161365                | 6.760880 | 8.341768 |
| 11            | 6             | 7.186264                | 5.798379 | 4.339134 |
| 12            | 6             | 6.055215                | 6.587212 | 4.002090 |
| 13            | 6             | 8.241316                | 3.231846 | 5.818245 |
| 14            | 6             | 7.828123                | 4.537721 | 6.512925 |
| 15            | 1             | 7.185014                | 4.256406 | 7.354498 |

|    |   |           |           |           |
|----|---|-----------|-----------|-----------|
| 16 | 6 | 3.681122  | 4.430561  | 8.906247  |
| 17 | 6 | 8.969542  | 5.358718  | 7.101463  |
| 18 | 6 | 2.931678  | 3.201472  | 9.120302  |
| 19 | 6 | 4.475745  | 6.635809  | 9.564251  |
| 20 | 1 | 4.519648  | 7.439984  | 10.292634 |
| 21 | 6 | 3.742791  | 5.489124  | 9.835203  |
| 22 | 1 | 3.213534  | 5.408175  | 10.777141 |
| 23 | 7 | 9.862926  | 5.899500  | 6.240996  |
| 24 | 6 | 5.941471  | 7.168107  | 2.732064  |
| 25 | 1 | 5.072108  | 7.767390  | 2.486445  |
| 26 | 6 | 8.226700  | 5.580592  | 3.426262  |
| 27 | 1 | 9.103841  | 5.009744  | 3.695494  |
| 28 | 6 | 9.562891  | 2.761601  | 5.823370  |
| 29 | 1 | 10.351737 | 3.358394  | 6.263833  |
| 30 | 6 | 3.670452  | 2.354887  | 6.916435  |
| 31 | 6 | 7.238873  | 2.441462  | 5.227077  |
| 32 | 1 | 6.210818  | 2.785050  | 5.222009  |
| 33 | 6 | 6.969045  | 6.946387  | 1.819054  |
| 34 | 1 | 6.911161  | 7.380909  | 0.826043  |
| 35 | 6 | 8.095120  | 6.163760  | 2.166255  |
| 36 | 1 | 8.882065  | 6.015525  | 1.433270  |
| 37 | 6 | 2.938865  | 2.233897  | 8.158097  |
| 38 | 1 | 2.392081  | 1.308202  | 8.285079  |
| 39 | 6 | 9.878565  | 1.527201  | 5.240370  |
| 40 | 1 | 10.907417 | 1.180266  | 5.246529  |
| 41 | 6 | 9.066257  | 5.558900  | 8.485835  |
| 42 | 1 | 8.336081  | 5.111531  | 9.152018  |
| 43 | 6 | 2.154641  | 3.009024  | 10.397605 |
| 44 | 1 | 1.648046  | 2.041255  | 10.403801 |
| 45 | 1 | 1.395039  | 3.790815  | 10.521279 |
| 46 | 1 | 2.812695  | 3.053439  | 11.274364 |
| 47 | 6 | 7.555862  | 1.210240  | 4.648303  |
| 48 | 1 | 6.766035  | 0.614178  | 4.203121  |
| 49 | 6 | 11.023750 | 6.910043  | 8.101162  |
| 50 | 1 | 11.843202 | 7.527168  | 8.452255  |
| 51 | 6 | 8.878205  | 0.748107  | 4.652077  |
| 52 | 1 | 9.124416  | -0.208551 | 4.201750  |
| 53 | 6 | 10.108860 | 6.341627  | 8.992516  |
| 54 | 1 | 10.202705 | 6.505993  | 10.061060 |
| 55 | 6 | 10.860378 | 6.662130  | 6.734222  |
| 56 | 1 | 11.545058 | 7.079421  | 6.003359  |



**Table S13** Optimized coordinates for [Zn(L')Cl] complex

| Center Number | Atomic Number | Coordinates (Angstroms) |           |           |
|---------------|---------------|-------------------------|-----------|-----------|
|               |               | X                       | Y         | Z         |
| 1             | 8             | 14.488700               | 3.145237  | 13.809071 |
| 2             | 7             | 14.333733               | 1.827862  | 11.263424 |
| 3             | 7             | 16.693662               | 0.609007  | 11.596967 |
| 4             | 1             | 17.113682               | 1.505973  | 11.345774 |
| 5             | 6             | 17.978751               | 0.566161  | 13.667558 |
| 6             | 6             | 13.557499               | 2.851793  | 10.974551 |
| 7             | 1             | 13.170731               | 2.968854  | 9.960496  |
| 8             | 6             | 13.163360               | 3.891074  | 11.899367 |
| 9             | 6             | 18.843746               | -0.777808 | 11.676699 |
| 10            | 6             | 15.848805               | 0.086720  | 10.544568 |
| 11            | 6             | 12.264024               | 4.893014  | 11.424450 |
| 12            | 6             | 14.632878               | 0.796671  | 10.324574 |
| 13            | 6             | 13.636413               | 3.994123  | 13.268204 |
| 14            | 6             | 17.604958               | -0.242155 | 12.402484 |
| 15            | 1             | 16.996101               | -1.091893 | 12.745060 |
| 16            | 6             | 11.802312               | 5.965494  | 12.215071 |
| 17            | 7             | 17.052308               | 1.461284  | 14.109186 |
| 18            | 6             | 16.156918               | -1.034711 | 9.757535  |
| 19            | 1             | 17.081629               | -1.576899 | 9.919861  |
| 20            | 6             | 12.282696               | 6.034105  | 13.560315 |
| 21            | 1             | 11.945377               | 6.844064  | 14.201038 |
| 22            | 6             | 13.162370               | 5.095818  | 14.064946 |
| 23            | 1             | 13.522263               | 5.148397  | 15.087636 |
| 24            | 6             | 19.168524               | -2.146881 | 11.763731 |
| 25            | 1             | 18.523490               | -2.816099 | 12.330716 |
| 26            | 6             | 19.685773               | 0.077088  | 10.933093 |
| 27            | 1             | 19.456099               | 1.138626  | 10.854393 |
| 28            | 6             | 15.272020               | -1.448944 | 8.744549  |
| 29            | 1             | 15.513600               | -2.321480 | 8.143336  |
| 30            | 6             | 10.877174               | 6.921588  | 11.631233 |
| 31            | 6             | 13.759664               | 0.379673  | 9.298395  |
| 32            | 1             | 12.812008               | 0.889967  | 9.150406  |
| 33            | 6             | 10.932235               | 5.689906  | 9.474625  |
| 34            | 6             | 19.179458               | 0.374465  | 14.374489 |
| 35            | 1             | 19.911872               | -0.339891 | 14.017030 |
| 36            | 6             | 10.474636               | 6.772873  | 10.322828 |
| 37            | 1             | 9.785183                | 7.468194  | 9.857531  |
| 38            | 6             | 21.142350               | -1.799260 | 10.374177 |
| 39            | 1             | 22.022359               | -2.190545 | 9.869812  |

|    |    |           |           |           |
|----|----|-----------|-----------|-----------|
| 40 | 6  | 14.082249 | -0.735149 | 8.507368  |
| 41 | 1  | 13.397964 | -1.057755 | 7.727266  |
| 42 | 6  | 20.824794 | -0.428941 | 10.282812 |
| 43 | 1  | 21.461530 | 0.238511  | 9.707186  |
| 44 | 6  | 20.311373 | -2.657686 | 11.118259 |
| 45 | 1  | 20.546885 | -3.716504 | 11.191489 |
| 46 | 6  | 18.450628 | 2.049151  | 15.980476 |
| 47 | 1  | 18.600455 | 2.642810  | 16.876222 |
| 48 | 6  | 19.412636 | 1.119191  | 15.544900 |
| 49 | 1  | 20.332570 | 0.976547  | 16.105477 |
| 50 | 6  | 17.274489 | 2.193348  | 15.229012 |
| 51 | 1  | 16.484645 | 2.885888  | 15.502621 |
| 52 | 8  | 10.641981 | 5.465030  | 8.292671  |
| 53 | 8  | 11.842021 | 4.763554  | 10.105614 |
| 54 | 6  | 10.357422 | 8.074585  | 12.461679 |
| 55 | 1  | 9.817554  | 7.711694  | 13.346477 |
| 56 | 1  | 11.180003 | 8.708822  | 12.818449 |
| 57 | 1  | 9.674061  | 8.699696  | 11.879457 |
| 58 | 30 | 15.127998 | 1.365323  | 13.162557 |
| 59 | 17 | 14.356592 | -0.666807 | 14.027198 |

**Table S14** Optimized coordinates for [Cu(L'')Cl] complex

| Center Number | Atomic Number | Coordinates (Angstroms) |          |           |
|---------------|---------------|-------------------------|----------|-----------|
|               |               | X                       | Y        | Z         |
| 1             | 29            | 11.770658               | 4.214216 | 13.010733 |
| 2             | 8             | 7.253934                | 1.528512 | 11.473454 |
| 3             | 8             | 11.903742               | 2.826455 | 11.638165 |
| 4             | 8             | 5.041835                | 0.956576 | 11.486971 |
| 5             | 7             | 9.905570                | 3.787892 | 13.471032 |
| 6             | 7             | 13.751763               | 4.460161 | 13.260979 |
| 7             | 7             | 11.763850               | 5.115884 | 14.838742 |
| 8             | 6             | 9.132619                | 2.987793 | 12.764727 |
| 9             | 1             | 8.089853                | 2.852212 | 13.046557 |
| 10            | 6             | 9.460032                | 4.500048 | 14.621836 |
| 11            | 6             | 9.536998                | 2.227817 | 11.613385 |
| 12            | 6             | 10.457119               | 5.215647 | 15.362242 |
| 13            | 6             | 10.893865               | 2.169840 | 11.105148 |
| 14            | 6             | 14.045453               | 5.309218 | 14.294269 |
| 15            | 6             | 8.536884                | 1.452209 | 10.947686 |
| 16            | 6             | 13.043289               | 6.893480 | 16.051583 |
| 17            | 6             | 8.798457                | 0.647194 | 9.822686  |
| 18            | 6             | 6.130004                | 0.809777 | 10.917191 |

|    |    |           |           |           |
|----|----|-----------|-----------|-----------|
| 19 | 6  | 12.884347 | 5.727182  | 15.127948 |
| 20 | 6  | 8.117657  | 4.541445  | 15.056708 |
| 21 | 1  | 7.337666  | 4.038497  | 14.494832 |
| 22 | 6  | 8.755449  | 5.915220  | 16.969097 |
| 23 | 1  | 8.483275  | 6.450220  | 17.874688 |
| 24 | 6  | 10.088719 | 5.906131  | 16.540930 |
| 25 | 1  | 10.838035 | 6.431682  | 17.118456 |
| 26 | 6  | 10.148575 | 0.613379  | 9.347853  |
| 27 | 1  | 10.387184 | 0.005173  | 8.479955  |
| 28 | 6  | 11.153604 | 1.334410  | 9.961427  |
| 29 | 1  | 12.175107 | 1.307937  | 9.596166  |
| 30 | 6  | 7.702103  | -0.088916 | 9.215957  |
| 31 | 6  | 14.709861 | 4.031369  | 12.417373 |
| 32 | 1  | 14.375659 | 3.378047  | 11.617923 |
| 33 | 6  | 6.437249  | 0.003196  | 9.752491  |
| 34 | 1  | 5.597867  | -0.532434 | 9.323656  |
| 35 | 6  | 13.647963 | 6.777059  | 17.320615 |
| 36 | 1  | 13.993238 | 5.806748  | 17.671670 |
| 37 | 6  | 7.768516  | 5.242023  | 16.219140 |
| 38 | 1  | 6.730358  | 5.263911  | 16.539720 |
| 39 | 6  | 12.590054 | 8.153812  | 15.595921 |
| 40 | 1  | 12.134121 | 8.229685  | 14.610499 |
| 41 | 6  | 16.049439 | 4.434387  | 12.570797 |
| 42 | 1  | 16.804782 | 4.077036  | 11.878741 |
| 43 | 6  | 15.363312 | 5.761566  | 14.490504 |
| 44 | 1  | 15.585410 | 6.454156  | 15.294233 |
| 45 | 6  | 13.785137 | 7.912975  | 18.141484 |
| 46 | 1  | 14.242977 | 7.818583  | 19.123016 |
| 47 | 6  | 16.374126 | 5.312887  | 13.620740 |
| 48 | 1  | 17.397474 | 5.651616  | 13.756401 |
| 49 | 6  | 7.953173  | -0.951555 | 7.998886  |
| 50 | 1  | 7.031334  | -1.437692 | 7.666508  |
| 51 | 1  | 8.693047  | -1.734222 | 8.213738  |
| 52 | 1  | 8.343240  | -0.353377 | 7.164583  |
| 53 | 6  | 12.736680 | 9.285288  | 16.417798 |
| 54 | 1  | 12.389321 | 10.253011 | 16.065256 |
| 55 | 6  | 13.330482 | 9.167938  | 17.691056 |
| 56 | 1  | 13.438949 | 10.044968 | 18.324466 |
| 57 | 17 | 11.481686 | 6.484428  | 12.022982 |

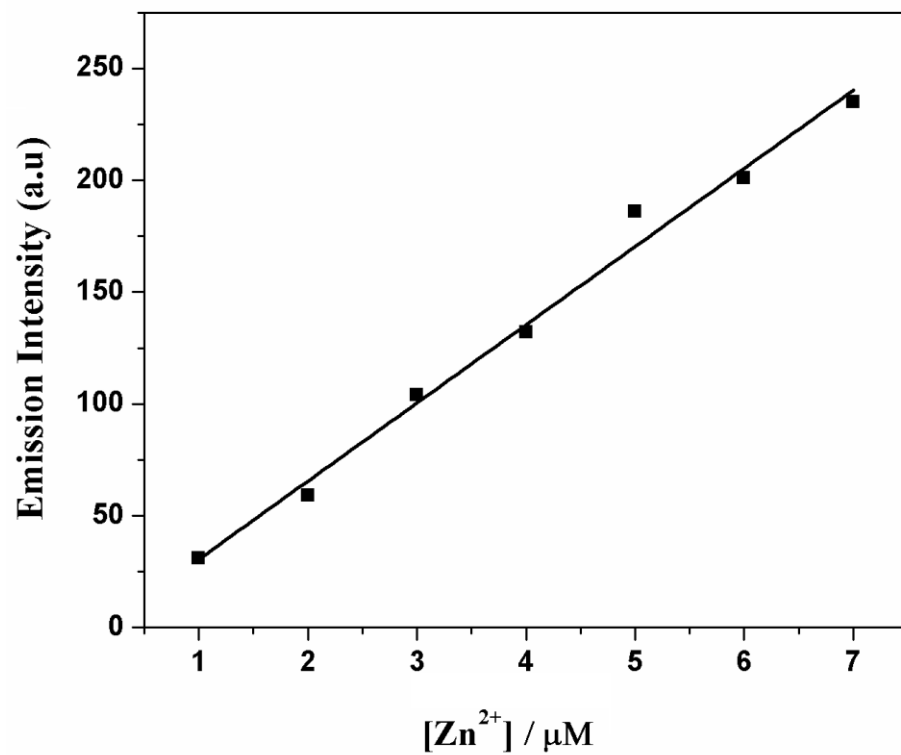

Fig. S28 Calibration plot for recovery of Zn<sup>2+</sup> ion.

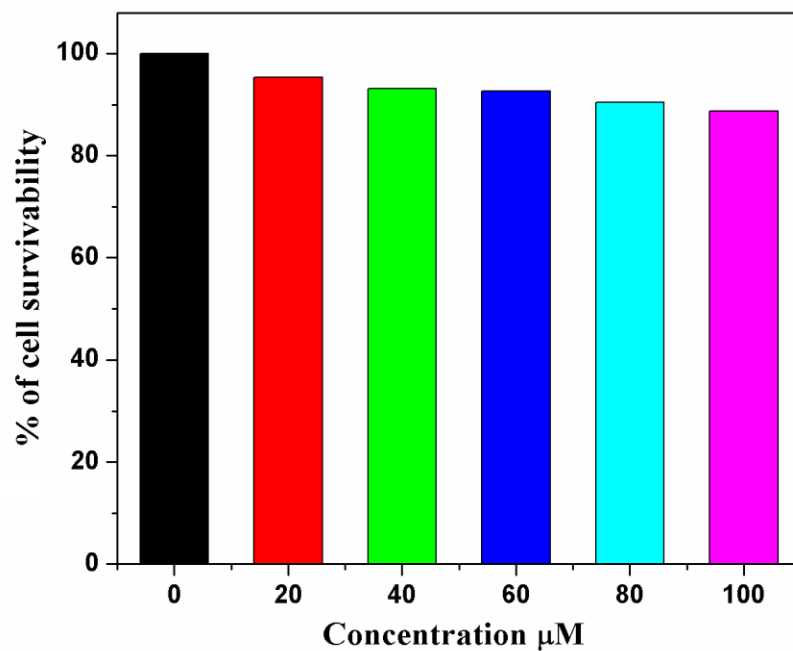

Fig. S29 Cell survivability of WI-38 cells exposed to L.

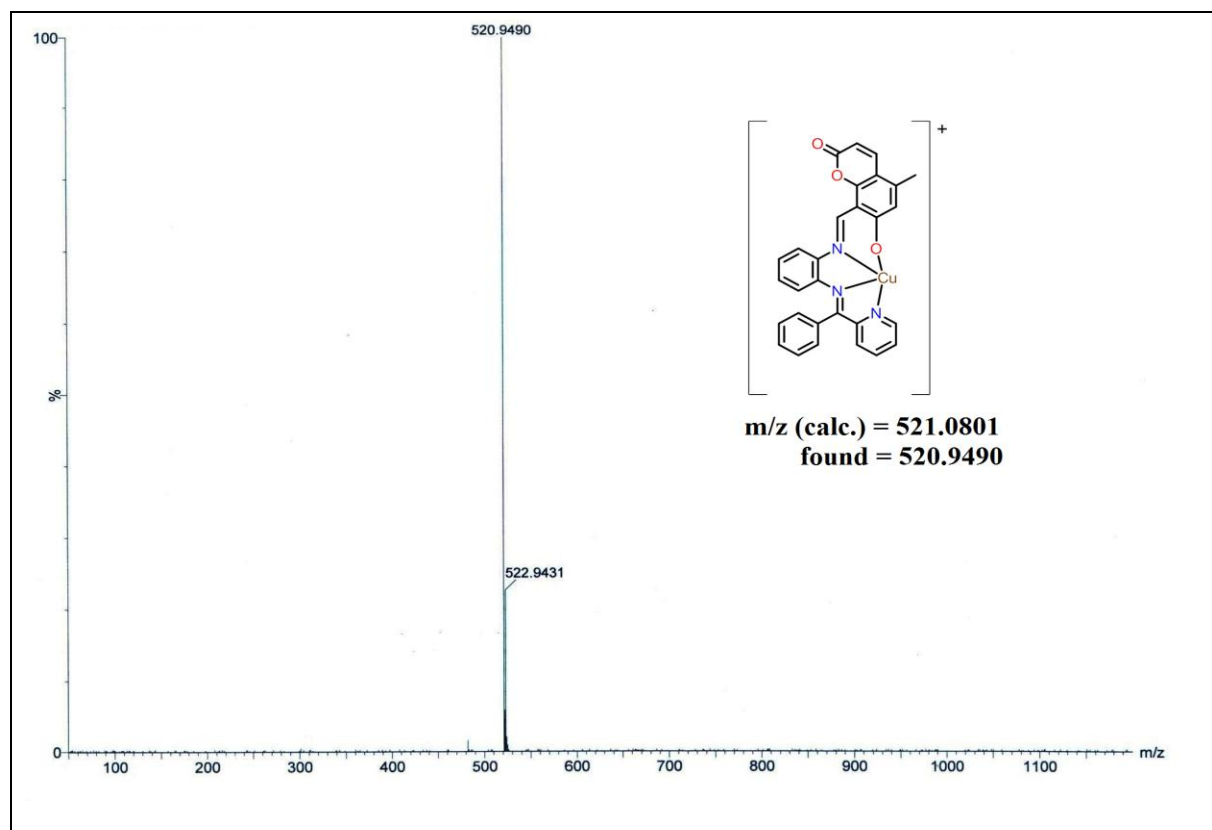

**Fig. S30** ESI-MS spectrum of [Cu(L'')Cl] complex.

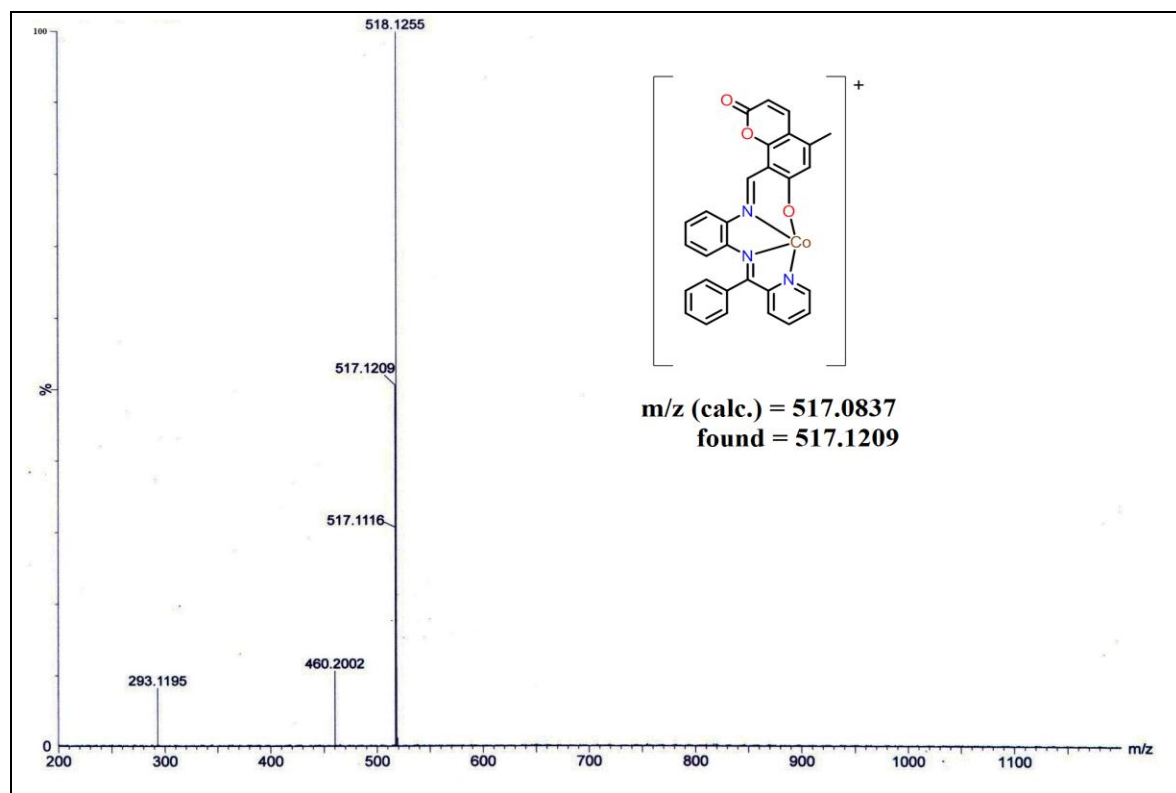

**Fig. S31** ESI-MS spectrum of  $[\text{Co}(\text{L}')(\text{NO}_3)]$  complex.

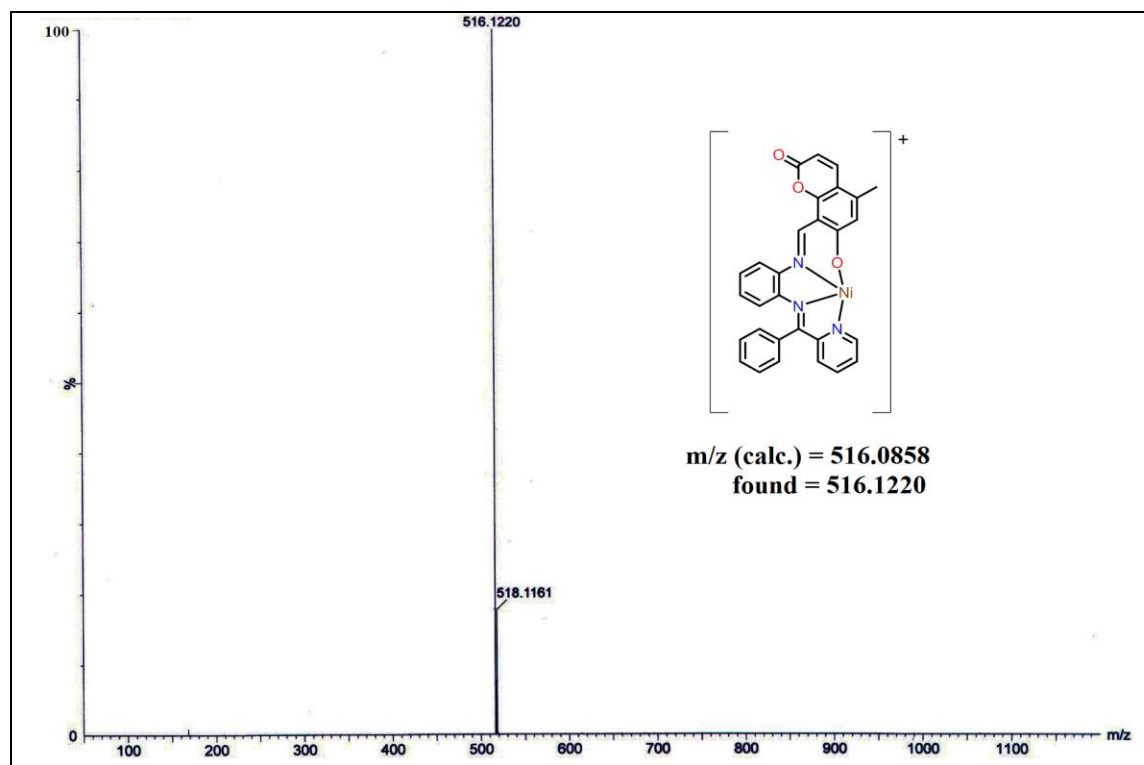

**Fig. S32** ESI-MS spectrum of [Ni(L'')(Cl)] complex.

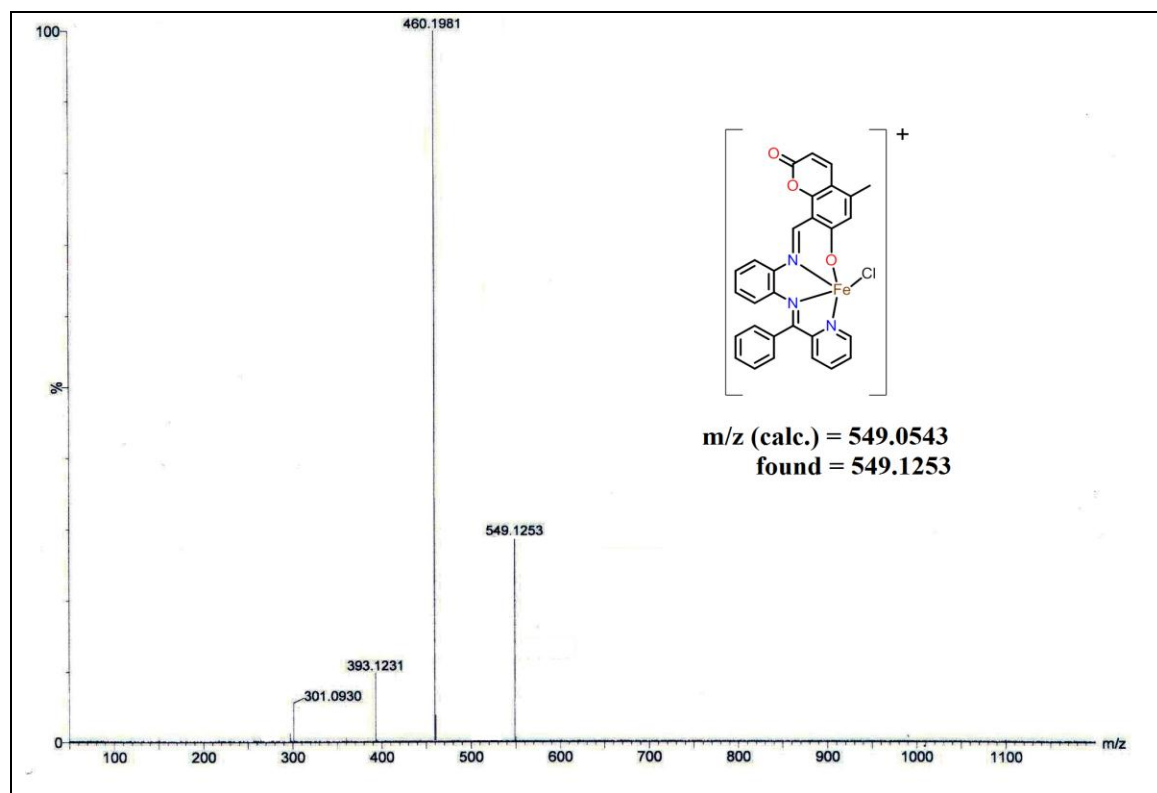

**Fig. S33** ESI-MS spectrum of  $[\text{Fe}(\text{L}'')(\text{Cl})_2]$  complex.

## References

- 1 S. Chaudhuri, S. C. Patra, P. Saha, A. S. Roy, S. Maity, S. Bera, P. S. Sardar, S. Ghosh, T. Weyhermüllerc and P. Ghosh, *Dalton Trans.*, 2013, **42**, 15028-15042.
- 2 K. Das, U. Panda, A. Datta, S. Roy, S. Mondal, C. Massera, T. Askun, P. Celikboyun, E. Garribba, C. Sinha, K. Anand, T. Akitsu and K. Kobayashi, *New J. Chem.*, 2015, **39**, 7309-7321.
- 3 D. D. Perrin, W. L. F. Armarego, D. R. Perrin, *Purification of Laboratory Chemicals*, Pergamon Press, Oxford, U.K., 1980.



- 4 D. Maiti, A. S. M. Islam, M. Sasmal, C. Prodhan and Mahammad Ali, *Photochem. Photobiol.Sci.*, 2018, **17**, 1213-1221.
- 5 A. Samui, K. Pal, P. Karmakar and S. K. Sahu, *Mater. Sci. Eng. C*, 2019, **98**, 772-781.
- 6 K. Pal, S. Roy, P. K. Parida, A. Dutta, S. Bardhan, S. Das, K. Jana and P. Karmakar, *Mater. Sci. Eng. C*, 2019, **95**, 204-216.
- 7 Y. Gao, H. Liu, P. Li, Q. Liu, W. Wang and B. Zhao, *Tetrahedron Letters* 2017, **58**, 2193-2198.
- 8 M. Yan, T. Li and Z. Yang, *Inorg. Chem. Comm.*, 2011, **14**, 463-465.
- 9 J.-H. Hu, Y. Suna, J. Qi, Q. Li and T.-B. Wei, *Spectrochim. Acta, Part A*, 2017, **175**, 125-133.
- 10 C. Patra, A. K. Bhanja, A. Mahapatra, S. Mishra, K. D. Saha, C. Sinha, *RSC Adv.*, 2016, **6**, 76505-76513.
- 11 C. Patra, C. Sen, A.D. Mahapatra, D. Chattopadhyay, A. Mahapatra and C. Sinha, *J. Photoch. Photobio. A*, 2017, **341**, 97-107.
- 12 S. Dey, R. Purkait, C. Patra, M. Saha, S. Mondal, K. D. Saha and Chittaranjan Sinha, *New J. Chem.*, 2018, **42**, 16297-16306.
- 13 D. Sarkar, A. K. Pramanik and T. K. Mondal, *J. Lumin.*, 2014, **146**, 480-485.
- 14 J.-m. An, M.-h. Yan, Z.-y. Yang, T.-r. Li and Q.-x. Zhou, *Dyes Pigm.*, 2013, **99**, 1-5.
- 15 M. Z. Jonaghani, H. Zali-Boeini and H. Moradi, *Spectrochim. Acta, Part A*, 2019, **207**, 16-22.
- 16 D. Sarkar, A. K. Pramanik and T. K. Mondal, *RSC Adv.*, 2015, **5**, 7647-7653.

17 M. L. Aulsebrook, B. Graham, M. R. Grace and K. L. Tuck, *Supramol. Chem.*, 2015, **27**, 798-806.
